1 **Human SYNGAP1 Regulates the Development of Neuronal Activity by**  
2 **Controlling Dendritic and Synaptic Maturation**

3  
4 *Nerea Llamosas<sup>1</sup>, Vineet Arora<sup>1</sup>, Ridhima Vij<sup>2,3</sup>, Murat Kilinc<sup>1</sup>, Lukasz Bijoch<sup>4</sup>, Camilo*  
5 *Rojas<sup>1</sup>, Adrian Reich<sup>5</sup>, BanuPriya Sridharan<sup>6∞</sup>, Erik Willems<sup>7</sup>, David R. Piper<sup>7</sup>, Louis*  
6 *Scampavia<sup>6</sup>, Timothy P. Spicer<sup>6</sup>, Courtney A. Miller<sup>1,6</sup>, J. Lloyd Holder Jr<sup>2,3</sup>, Gavin*  
7 *Rumbaugh<sup>1\*</sup>*

8  
9 <sup>1</sup>Department of Neuroscience, Scripps Research, Jupiter, Florida 33458, USA

10 <sup>2</sup>Jan and Dan Duncan Neurological Research Institute at Texas Children's Hospital, Houston  
11 Texas 77030, USA

12 <sup>3</sup>Department of Pediatrics, Baylor College of Medicine, Houston, Texas 77030, USA

13 <sup>4</sup>Laboratory of Neurobiology, BRAINCITY, Nencki Institute of Experimental Biology, Polish  
14 Academy of Sciences, Warsaw, Poland

15 <sup>5</sup>Center for Computational Biology and Bioinformatics, Scripps Research, Jupiter, Florida 33458,  
16 USA

17 <sup>6</sup>Department of Molecular Medicine, Scripps Research, Jupiter, Florida 33458, USA

18 <sup>7</sup>Cell Biology, Thermo Fisher Scientific, Carlsbad, California 92008, USA

19 <sup>∞</sup>Current Address: GSK 1250 S Collegeville Rd., Collegeville, PA 19426,  
20  
21

22 **\*Corresponding Author:**

23 *Gavin Rumbaugh*

24 *Department of Neuroscience*

25 *130 Scripps Way #3B3*

26 *Jupiter, FL 33458*

27 *[gavin@scripps.edu](mailto:gavin@scripps.edu)*

28

29

30 **Abstract**

31 *SYNGAP1* is a major genetic risk factor for global developmental delay, autism spectrum  
32 disorder, and epileptic encephalopathy. *De novo* loss-of-function variants in this gene cause a  
33 neurodevelopmental disorder defined by cognitive impairment, social-communication disorder,  
34 and early-onset seizures. Cell biological studies in mouse and rat neurons have shown that  
35 *Syngap1* regulates developing excitatory synapse structure and function, with loss-of-function  
36 variants driving formation of larger dendritic spines and stronger glutamatergic transmission.  
37 However, studies to date have been limited to mouse and rat neurons. Therefore, it remains  
38 unknown how *SYNGAP1* loss-of-function impacts the development and function of human  
39 neurons. To address this, we employed CRISPR/Cas9 technology to ablate *SYNGAP1* protein  
40 expression in neurons derived from a human induced pluripotent stem cell line (hiPSC).  
41 Reducing SynGAP protein expression in developing hiPSC-derived neurons enhanced dendritic  
42 morphogenesis, leading to larger neurons compared to those derived from isogenic controls.  
43 Consistent with larger dendritic fields, we also observed a greater number of morphologically  
44 defined excitatory synapses in cultures containing these neurons. Moreover, neurons with  
45 reduced SynGAP protein had stronger excitatory synapses and expressed synaptic activity  
46 earlier in development. Finally, distributed network spiking activity appeared earlier, was  
47 substantially elevated, and exhibited greater bursting behavior in *SYNGAP1* null neurons. We  
48 conclude that *SYNGAP1* regulates the postmitotic maturation of human neurons made from  
49 hiPSCs, which influences how activity develops within nascent neural networks. Alterations to  
50 this fundamental neurodevelopmental process may contribute to the etiology of *SYNGAP1*-  
51 related disorders.

52

53

## 54 **Introduction**

55 Pathogenic loss-of-function variants in the *SYNGAP1* gene are causally-linked to a range of  
56 neuropsychiatric disorders, including global developmental delay (GDD)/intellectual disability  
57 (ID) (Hamdan et al., 2009; Rauch et al., 2012; Deciphering Developmental Disorders, 2015,  
58 2017) and severe epilepsy (Carvill et al., 2013; von Stulpnagel et al., 2015; Vlaskamp et al.,  
59 2019). *SYNGAP1* is also strongly implicated in autism spectrum disorders (Rauch et al., 2012;  
60 O'Roak et al., 2014) and was recently identified as one of three genes that impart the highest  
61 risk for developing autistic features (Satterstrom et al., 2020). While pathogenic variants in  
62 *SYNGAP1* are overall rare, they are common relative to the pool of genes capable of causing  
63 sporadic neurodevelopmental disorders, explaining up to ~1% of GDD/ID cases (Berryer et al.,  
64 2013; Parker et al., 2015). While the exact incidence of *SYNGAP1* pathogenicity remains  
65 unknown, early estimates are 1/10,000 (Parker et al., 2015; Weldon et al., 2018), which is in the  
66 range of other monogenic disorders that are more extensively studied by the scientific  
67 community. Causality of *SYNGAP1* pathogenicity is now established because there are no  
68 known loss-of-function variants in >141,000 neurotypical individuals from the gnomAD database  
69 and all known patients with clearly pathogenic variants are diagnosed with a  
70 neurodevelopmental disorder (Mignot et al., 2016). Moreover, the pLI ratio for *SYNGAP1* is 1  
71 (Lek et al., 2016; Jimenez-Gomez et al., 2019), demonstrating that the human gene is extremely  
72 intolerant of loss-of-function variants. Based on substantial clinical evidence, proper *SYNGAP1*  
73 expression is required for normal human brain development and function.

74

75 *Syngap1* gene function has been studied in rodent neurons (Kilinc et al., 2018; Gamache et al.,  
76 2020). *Syngap1* is a potent regulator of dynamic processes required for Hebbian plasticity at  
77 excitatory synapses. Heterozygous knockout mice exhibit deficits in hippocampal LTP evoked  
78 through a variety of synaptic stimulation protocols (Komiyama et al., 2002; Kim et al., 2003).  
79 This function of SynGAP protein is consistent with cognitive impairment commonly observed in  
80 *SYNGAP1* patients because Hebbian plasticity at excitatory synapses is thought to contribute  
81 importantly to learning. Genetic re-expression of *Syngap1* in adult mutant mice rescues  
82 hippocampal LTP and associated downstream signaling pathways (Ozkan et al., 2014). Thus,  
83 SynGAP regulation of synapse plasticity is a dynamic function of the protein that is retained  
84 throughout life. Hundreds of genes regulate synaptic plasticity as referenced by the Gene  
85 Ontology Browser (366 genes;  
86 [http://www.informatics.jax.org/vocab/gene\\_ontology/GO:0048167](http://www.informatics.jax.org/vocab/gene_ontology/GO:0048167)). However, most of them do  
87 not cause disease when heterozygously expressed, as is the case for *SYNGAP1* (Carvill et al.,

88 2013; Deciphering Developmental Disorders, 2015, 2017; Satterstrom et al., 2020). Therefore,  
89 *SYNGAP1* likely has additional functions beyond regulation of synapse plasticity that contribute  
90 to disease etiology. Indeed, there are additional reported functions of the *Syngap1* gene.  
91 SynGAP expression in developing mouse neurons acts to regulate the maturation rate of  
92 excitatory synapse strength and this function is independent from its role in plasticity. SynGAP  
93 protein expression rises quickly during postnatal development (Gou et al., 2020) and its  
94 expression during this period is critical for shaping the strength of nascent excitatory synapses  
95 (Clement et al., 2012; Clement et al., 2013). *Syngap1* heterozygous mice have enhanced  
96 excitatory synapse function in the developing cortex and hippocampus, which is thought to  
97 contribute to early onset of behavioral deficits and seizures observed in these animals. In  
98 contrast to Hebbian processes, this function of rodent *Syngap1* is linked to biological process  
99 unique to developing neurons. Enhanced baseline excitatory synaptic strength in hippocampal  
100 neurons is transiently observed during the first three postnatal weeks of brain development and  
101 inducing heterozygosity of *Syngap1* beyond this period has minimal effect on resting synaptic  
102 function in these neurons (Clement et al., 2012).

103

104 The understanding of how this gene contributes to disease-relevant biology is limited because  
105 information on its function in human neurons is lacking. This is limiting because there are  
106 fundamental differences in how human and rodent brains develop. For example, humans  
107 express neoteny, or slowing of development, which is thought to promote an extended period of  
108 neural network refinement that promotes higher cognitive functions. An example of neoteny at  
109 the neurobiological level is the relative pace of human neuron development compared to  
110 rodents (Petanjek et al., 2011; Charrier et al., 2012), with human neurons exhibiting a much  
111 slower pace of postmitotic differentiation. Given that *Syngap1* alters measures of neuronal  
112 maturation in rodents (Clement et al., 2012; Clement et al., 2013; Aceti et al., 2015), this  
113 function of the gene may be amplified in slower developing human neurons. To test this idea,  
114 we created *SYNGAP1* knockout human induced pluripotent stem cell (hiPSC) lines using  
115 CRISPR/Cas9 technology. These iPSCs were then differentiated into neurons (iNeurons) and  
116 cultures were assessed for various parameters of neuronal maturation. We found that human  
117 iNeurons lacking SynGAP expression exhibited accelerated dendritic morphogenesis, increased  
118 accumulation of postsynaptic markers, early expression of synapse activity, enhanced excitatory  
119 synaptic strength, and early onset of neural network activity. We conclude that *SYNGAP1*  
120 regulates the postmitotic differentiation rate of developing human neurons and disrupting this  
121 process impacts the function of nascent neural networks. These observations in human neurons

122 are consistent with findings from rodent studies, indicating that control of neuronal maturation is  
123 a species-conserved function of the gene. Therefore, disruptions to this fundamental  
124 neurodevelopmental process may contribute to the etiology of *SYNGAP1*-related brain  
125 disorders.

126

## 127 **Material and Methods**

### 128 **Maintenance of hiPSC cultures**

129 All hiPSC work was performed in accordance with approved protocols from appropriate  
130 Institutional Review Boards. All products were purchased from Thermo Fisher Scientific unless  
131 otherwise noted. The stable human episomal Cas9 hiPSC cell line was obtained from Thermo  
132 Fisher Scientific (A33124) and was expanded according to the manufacturer's suggested  
133 protocol. This line was previously used for generating neurons (Sridharan et al., 2019). Briefly,  
134 culture plates were coated with Vitronectin-N (A14700), diluted 1:100 in DPBS (14190094), and  
135 incubated at 37 °C for at least 1 h prior to iPSC plating. Cryopreserved iPSC cells were gently  
136 thawed in a 37 °C water bath and transferred to a 15 mL conical tube with Complete iPSC  
137 Medium + 1% RevitaCell supplement (A2644501). Cells were then centrifuged at 200 x g for  
138 4 min and the iPSC pellet was re-suspended in fresh medium and plated on vitronectin coated  
139 flasks. Twenty-four hours later, cells were switched and maintained in Complete Stemflex  
140 Medium (w/o RevitaCell) with daily medium changes until 70% confluent. Cells were then  
141 harvested with TrypLE Select (12563011) and further maintained or plated for experimental  
142 purposes. For limiting dilution cloning, iPSCs were plated in 96-well plates coated with 2.5µm/ml  
143 rhLaminin-521 (A29248).

144

### 145 **Generation of *SYNGAP1* KO hiPSC lines**

146 Guide RNA (*gRNA*) sequences targeting exon 7 of *SYNGAP1* were selected using the Zhang  
147 lab CRISPR design tool (<http://zlab.bio/guidedesign-resources>) and acquired from IDT in single  
148 guide RNAs (*sgRNA*) format. Cas9-iPSCs were transfected with *sgRNAs* by using  
149 Lipofectamine CRISPRMAX (Thermo Scientific, CMAX00001) according to manufacturer's  
150 instructions. Editing efficiency of individual *sgRNAs* was determined using GeneArt Genomic  
151 Cleavage Detection Kit (Thermo Scientific, A24372). *sgRNA-5* (target sequence 5'-  
152 TCTTTCGGCCGCAGACCGAC-3') demonstrated the highest efficiency and was selected for  
153 downstream applications. To generate the *SYNGAP1* KO iPSC lines, cells were transfected with  
154 *sgRNA-5*. Twenty-four hours after the transfection, cells were plated in rhLaminin-521 coated  
155 96-well plates with an average density of 0.5 cells/well. Colonies derived from a single cell were

156 expanded and cryopreserved with *Recovery* cell culture freezing medium (Thermo Scientific,  
157 12648010). Approximately 70 colonies originating from a single cell were analyzed for Indels  
158 around the *sgRNA* targeting site. Multiple clones with either unedited (WT) or edited (potential  
159 KO) sequences were isolated and expanded. Potential KO clones with “clean” Sanger sequence  
160 traces were prioritized. Pluripotency of individual clones were confirmed via TaqMan Array  
161 Human Stem Cell Pluripotency Panel (4385344) according to manufacturers’ instructions. Each  
162 expanded clone was tested, and confirmed negative, for mycoplasma contamination using  
163 Universal Mycoplasma Detection Kit (ATCC, 30-1012K).

164

### 165 **Whole exome sequencing (WES)**

166 Genomic DNA from the four experimental clones and a sample of the original Cas9 iPSC line  
167 (before CRISPR transfection) were extracted using PureLink Genomic DNA mini Kit (Invitrogen  
168 #k1820-02) using included instructions. Genomic DNA from each of the five samples was  
169 shipped to HudsonAlpha Institute for Biotechnology, Genome Sequencing Center (Huntsville,  
170 AL) for WES.

171

### 172 Library Preparation and Quality Control

173 DNA samples were normalized to 1,000ng of DNA in 50 $\mu$ l of water. Following normalization,  
174 samples were acoustically sheared via Covaris LE-220 instrument to a final fragment size of  
175 ~350-400bp. The sheared DNA was then transformed into a standard Illumina paired-end  
176 sequencing library via standard methods. The sheared DNA was end-repaired and A-tailed  
177 using Roche-Kapa End-Repair and A-Tailing kits under the manufacturer’s recommended  
178 conditions. Standard Illumina paired-end adaptors were ligated to the A-tailed DNA. Following  
179 ligation, the reactions were purified using AMPure XP beads. The purified ligated DNA was  
180 amplified via PCR using Roche KAPA HIFI PCR reagents using 4 cycles of PCR. The primers  
181 used in the PCR step introduced 8-base, unique, dual indexes in the i5 and i7 positions to allow  
182 sample identification/demultiplexing following sequencing. The final library was quality controlled  
183 using size verification via PerkinElmer LabChip GX and real-time PCR using the Roche KAPA  
184 SYBR FAST qPCR Master Mix, primers and standards according to the manufacturer’s  
185 directions. Libraries were normalized to 1.4 nM stocks for use in clustering and sequencing.

186

### 187 IDT Exome Capture and Quality Control

188 Post-library construction, samples were multiplexed for capture at 5 samples per pool with each  
189 sample contributing a maximum of 300ng or a minimum of 200ng to each pool. Pooled samples



190 were purified with beads and eluted in a volume of 30 $\mu$ l. Pooled samples were hybridized with  
191 the NimbleGen SeqCap EZ Exome v3 probes with minor modifications for automation. Briefly,  
192 multiplexed samples were dried down in the presence of COT-1 and a blocker mix for 1.5 hrs.  
193 Libraries were then resuspended in a mix of hybridization buffer and baits. Libraries were  
194 hybridized overnight at 65°C (72 hrs). Post-hybridization takedown occurred 72 hours later.  
195 Briefly, captured libraries were bound to streptavidin beads. Once bound, washing occurred per  
196 manufacturer's recommendations. Final elution of captured libraries was in 20 $\mu$ l of nuclease-  
197 free water. Libraries were amplified with six cycles of PCR and a final bead purification. Post-  
198 hybridization exome concentrations were measured via Picogreen and library sizes were  
199 determined via the LabChip GX Touch HT (PerkinElmer). Additionally, libraries were quantitated  
200 with real-time PCR using the KAPA Library Quantification Kit (Roche) per manufacturer's  
201 instructions to determine final library nanomolarity. Final exome libraries were pooled at a  
202 concentration of 1.8nM. The pooled exome libraries were distributed across four lanes on an  
203 S4 flow cell and sequenced using 150 base pair paired-end approach on a NovaSeq 6000  
204 instrument (Illumina). All sequencing was performed on the Illumina NovaSeq 6000 platform by  
205 loading a pool samples to the equivalent loading of 24 samples per flowcell. Following  
206 sequencing all basecalling was performed using standard Illumina software to generate the final  
207 FASTQ files for each sample. Alignment and variant calling was performed via the  
208 Edico/Illumina DRAGEN pipeline to verify coverage and performance. Samples yielded a  
209 minimum of 440M paired reads at 150nt read length with a mean coverage of greater than 30X.

210

### 211 **Karyotyping**

212 Karyotyping was performed as previously described (Sridharan et al., 2019). Briefly,  
213 differentiated iNeurons were assessed for any chromosomal aberrations using the Karyostat™  
214 assay (Thermo Fisher).

215

### 216 **Generation of induced Neurons (iNeurons) from Cas9-iPSC single cell clones**

217 Ngn2 transcription factor induced iNeurons were generated as previously described (Sridharan  
218 et al., 2019) with minor modifications. Briefly, Cas9-hiPSCs were harvested using TrypLE Select  
219 and 2 million cells were plated on vitronectin coated T75 flask on day 1. On day 2, medium was  
220 removed, and an appropriate amount of lentivirus expressing Ngn2 (Addgene, 52047) and rtTA  
221 (Addgene, 20342) were administered in Complete Stemflex Medium including 1% RevitaCell  
222 (MOI 2 for both lentivirus). After 24 h, the medium was aspirated and replaced with Induction  
223 Media induce TetO gene expression. The next day, medium was refreshed with Induction Media

224 + 2 µg/mL Puromycin (A1113803) which was included for selection of iNs. Twenty-four hours  
225 later, iNeurons were harvested using Accutase (A1110501) and plated on PDL coated plates in  
226 iNeuron Maintenance Media (Neurobasal (211103049) + 1% GlutaMax (35050061) + 2% B27  
227 (17504044) + 10ng/ml BDNF (PHC7074) + 10ng/ml GDNF (PHC7036) + 10ng/ml NT3  
228 (PHC7045) + 2.5% FBS (10082139), all from Thermo) + 10 µg/ml FuDR (Sigma, F0503) along  
229 with primary rat glia (neuron/glia ratio 2.5/1). Half of the medium was changed with fresh  
230 iNeuron Maintenance Media every 4-5 days.

231

### 232 **Dendritic Tracing**

233 Each well of a 96-well imaging plate contained ~50,000 cells per well, consisting of ~32,000  
234 human induced Neurons (iNs) + ~18,000 Primary Rat astrocytes along with 0.1% (~ 50 per  
235 well) of EGFP positive human induced Neurons derived from the same clone. eGFP-positive  
236 iNeurons were created through a separate induction as stated above, except that an additional  
237 lentivirus expressing eGFP under the control of a TET-responsive promoter was included  
238 (Addgene Cat # 30130). eGFP-positive neurons were mixed with eGFP-negative neurons in the  
239 96-well plates. iNeurons derived from either of the WT or KO clones were compared by tracing  
240 primary (originating from the soma), secondary, and tertiary dendrites, as well as total dendrite  
241 length. Tracing data was obtained by imaging live iNeurons at DIV45 with an InCell Analyzer  
242 6000 automated confocal microscope (20X magnification). A sample of 30 randomly selected  
243 neurons per genotype (n= 3 per well x 10 wells in a 96-well plate) was selected and then  
244 dendrites were traced with the Simple Neurite Tracer (SNT) software plugin distributed by Fiji-  
245 ImageJ. Data represents the average lengths in microns for all subtypes of dendrites.

246

### 247 **Immunocytochemistry**

248 iNeurons were re-plated, along with primary rat astrocytes, at a density of iNeurons  
249 200,000/120,000 astrocytes per well, on 15mm cover glass coated with PDL/Fibronectin  
250 (Neuvitro, GG-15-Fibronectin), in 24-well plates. At DIV30-45, cells were fixed and labelled with  
251 primary antibodies: anti-PSD95 (mouse-raised; Abcam Cat# ab2723-100ug), anti-GluA1  
252 (Rabbit-raised; Cell Signaling Technology Cat# 13185S) and anti-MAP2 (Guinea pig-raised;  
253 Synaptic Systems Cat # 188004). Then, secondary antibodies were applied (Goat anti-mouse  
254 Alexa 488, Abcam Cat# ab150113-500ug, Goat anti-rabbit Alexa 568, ThermoFisher Cat#  
255 A11036, Goat anti-guinea pig Alexa 647 ThermoFisher Cat# A21450). Images of neurons from  
256 multiple coverslips per culture were taken under UPlanSApo 100× 1.4 NA oil-immersion  
257 objective mounted on Olympus FV1000 laser-scanning confocal microscope (1 image = 1 field-



258 of-view). Neuronal somas from individual fields-of-view were manually calculated based on raw  
259 MAP2-signals. Total area of MAP2/field-of-view was determined on the area of mask of MAP2  
260 signal. Number of detected particles of GLUA1 and PSD95 per field-of-view was determined  
261 based on threshold-based signal masks. Thresholds were kept constant across all images.

262

### 263 **Immunoblotting**

264 iNeurons were co-cultured with rat glia (500,000 induced neurons, 100,000 glia) seeded on 12-  
265 well plates. After 30-60 days in culture, media was removed and the wells were washed with  
266 PBS, after which the PBS was replaced with 200ul of RIPA buffer (Cell Signaling Technology,  
267 Danvers, MA) containing Phosphatase Inhibitor Cocktails 2 and 3 (Sigma-Aldrich, St. Louis,  
268 MO) and MiniComplete Protease Inhibitor Cocktail (Roche Diagnostics), the wells were scraped  
269 using a sterile cell scraper on each well and transferred to tubes in dry ice, and stored at  $-80^{\circ}\text{C}$ .  
270 After thawing on ice, samples were sonicated using a probe sonicator 5 times with 2 sec pulses.  
271 Sample protein levels were measured (Pierce BCA Protein Assay Kit, Thermo Scientific,  
272 Rockford, IL), and volumes were adjusted to normalize microgram per microliter protein content.  
273 10  $\mu\text{g}$  of protein per sample were loaded and separated using SDS-PAGE on 4–15% gradient  
274 stain-free tris-glycine gels (Mini Protean TGX, BioRad, Hercules, CA), transferred to low  
275 fluorescence PVDF membranes (45  $\mu\text{m}$ ) with the Power Blotter- Semi-dry Transfer System  
276 (ThermoFisher Scientific). Membranes were blocked with 5% powdered milk in buffer and  
277 probed with pan-SynGAP (1:1,000, #5539, Cell Signaling) or SynGAP- $\alpha 2$  (abcam, ab77235),  
278 overnight at  $4^{\circ}\text{C}$  and HRP-conjugated anti-rabbit antibody (1:2,000, W4011, Promega) for 1 hr  
279 at room temperature followed by ECL signal amplification and chemiluminescence detection  
280 (SuperSignal West Pico Chemiluminescent Substrate; Thermo Scientific, Rockford, IL). Blot  
281 band densities were obtained using the ChemiDoc imaging system (BioRad). SynGAP levels of  
282 immunoreactivity were assessed by densitometric analysis of generated images with ImageJ.  
283 Values were normalized to total protein levels obtained from blots prior to antibody incubations.

284

### 285 **Whole Cell Electrophysiology**

286 iNeuron measurements were performed up to DIV50 as described with minor modifications  
287 (Sridharan et al., 2019). For current studies, iNeurons were co-cultured with cryo-recovered  
288 primary rat astrocytes (seeded at 20,000 iNs + 10,000 astrocytes per well) in 24-well plate on  
289 15 mm coverslips. The co-cultures were maintained in plating medium and additionally  
290 supplemented with 10  $\mu\text{g}/\text{mL}$  FUDR (cat. no. F0503, Sigma). For whole cell recordings, intrinsic  
291 electrical properties were inspected immediately after gaining access to the cell and miniature

292 excitatory synaptic currents were recorded in the presence of TTX (0.5  $\mu$ M) at room temperature  
293 in voltage-clamp configuration (cells were held at  $-60$  mV with a Multiclamp 700B amplifier,  
294 Molecular Devices). The bath solution contained (in mM): 140 NaCl, 5 KCl, 2 CaCl<sub>2</sub>, 2 MgCl<sub>2</sub>, 10  
295 HEPES-NaOH and 10 Glucose (pH to 7.4 adjusted with NaOH). Pipettes pulled from  
296 borosilicate glass capillary tubes (cat. no. G85150T-4, Warner Instruments) using a P-97 pipette  
297 puller (Sutter Instrument) were filled with the following intracellular solution (in mM): 123 K-  
298 gluconate, 10 KCl, 1 MgCl<sub>2</sub>, 10 HEPES-KOH, 1 EGTA, 0.1 CaCl<sub>2</sub>, 1 K<sub>2</sub>-ATP, 0.2 Na<sub>4</sub>-GTP and 4  
299 glucose (pH adjusted to 7.4 with KOH). Resistance of the pipettes filled with the intracellular  
300 solution was between 3–5 m $\Omega$ . Series resistance was monitored without compensation with  
301 5 mV depolarizing steps (200 ms) induced every 60s to ensure sufficient and stable electrical  
302 access to the cell. Data were sampled at 10 kHz, post hoc filtered and analyzed offline using  
303 Clampfit (Molecular Devices). Single peak mEPSCs were detected using a semiautomated  
304 sliding template detection procedure in which the template was generated by averaging multiple  
305 spontaneous currents. Each detected event was visually inspected and discarded if the  
306 amplitude was  $<7$  pA.

307

## 308 **Microelectrode Array (MEA) Analysis**

### 309 Cell culture and NPC differentiation

310 Individual *SYNGAP1* WT and KO iPSC clones were maintained on Matrigel-coated plates in  
311 Stem Flex media (Fisher Scientific). Neural Progenitor Cells (NPCs) were differentiated from  
312 iPSCs using a dual SMAD inhibition protocol (Jiang et al., 2017). Briefly, stem cell lines were  
313 dissociated using Accutase and embryoid bodies were generated from the stem cell lines in the  
314 Aggrewwells using Neural Proliferation medium (NPM) along with BMP and WNT inhibitors  
315 (Dorsomorphin: DM; 4mM and SB-431542:SB 10mM; Sigma Aldrich), administered on Day 2 of  
316 neural induction. At  $\sim$  Day 5, EBs were gently collected and plated on Matrigel coated plates for  
317 the formation of rosettes. To promote dorsalization, 10mM Cyclopamine (CCP; Stem Cell  
318 technologies) was added to the plates starting Day 6. Both inhibitors and CCP were added to  
319 the media until  $\sim$  Day 9. Rosettes were collected between Day 14 and 16 and plated on gelatin-  
320 coated plates so that the non-neural cells were preferentially removed from floating neural  
321 progenitors, which were then dissociated to form a monolayer culture of neural progenitor cells.  
322 NPCs were grown and expanded on Matrigel coated plates before the cells were plated directly  
323 on a MEA plate for neuronal differentiation.

324

### 325 MEA analysis and neuronal differentiation

326 We employed an MEA system (Axion Biosystems) to perform neurophysiological  
327 characterization of iNeurons. Neuronal differentiation of NPCs was performed directly on MEA  
328 plates.  $1.6 \times 10^4$  NPCs suspended in a 5 $\mu$ l droplet of NPM (neural precursor medium) were  
329 plated as on top of a 16-electrode array (area  $\sim 1 \text{ mm}^2$ ) inside a single well of 48-well MEA plate  
330 pre-treated with 0.1% PEI solution prepared in borate buffer (pH=8.4). Two days later, neuronal  
331 differentiation was initiated using in neuronal induction medium (NIM, prepared from equal  
332 volumes of DMEM/F12 and neurobasal medium without growth factors) prepared in-house. NIM  
333 was exchanged every other day for 7 days. Differentiation of the NPCs into forebrain cortical  
334 neurons was performed using previously established neuronal differentiation medium, NDM,  
335 which includes a cocktail of differentiation factors (BDNF, GDNF, NT-3, dibutyryl-cAMP,  
336 ascorbic acid) (Jiang et al, 2017 Nature Comm). Post-differentiation, NDM was replaced with  
337 BrainPhys for further maturation (Stem Cell technologies), and neurons were cultured for at  
338 least one week before neuronal activity was recorded. Neuronal activity was  
339 recorded continuously for 5 minutes from the multi-well MEA plate each week until 6 weeks of  
340 neuronal maturation, post-differentiation. Field potential changes were recorded and analyzed  
341 using Axis Navigator and Axis metric plotting software (Axion Biosystems). Temporal raster  
342 plots were generated using Neural Metric Tool software (Axion Biosystems). For data analysis,  
343 a burst was identified as a group of at least 5 spikes, separated by an inter-spike interval (ISI) of  
344 less than 100 milliseconds. Network bursts were defined as a minimum of 50 spikes with a  
345 maximum ISI of 100 ms covering at least 35% of electrodes in a well.

346

### 347 **Statistics**

348 GraphPad Prism 8 software was used for all statistical analysis. All data were tested for  
349 normality. Accordingly, parametric or non-parametric tests were applied. For tracing data  
350 analyses, clonal comparisons were performed using Kruskal-Wallis test followed by Dunn's  
351 multiple comparison test. For genotype comparisons Mann-Whitney tests were applied. For  
352 immunostaining experiments, Mann-Whitney tests or unpaired two-tailed t-tests were used. For  
353 clonal comparisons of electrophysiological data Kruskal-Wallis followed by corrected Dunn's  
354 multiple comparison tests or One-way ANOVA followed by Tukey tests were used. Statistical  
355 differences of percentage mEPSC-expressing neurons were determined by Fischer exact test  
356 pair-wise comparisons. For genotypic comparisons of whole cell electrophysiological data,  
357 Mann-Whitney U tests or Unpaired t-tests were performed. When comparing cumulative  
358 probability data between clones or genotypes the Kolmogorov-Smirnov test was used. For  
359 multielectrode array studies, statistical analyses among clones was performed using two-way

360 RM ANOVA followed by Tukey's multiple comparison test and for genotype comparisons two-  
361 way RM ANOVA followed by Bonferroni's multiple comparison. Data throughout the text are  
362 presented either as box-and-whisker plots where the center, boxes and whiskers represent the  
363 median, interquartile range, and min to max, respectively, or as mean  $\pm$  SEM. Differences were  
364 considered to be significant for  $p < 0.05$ . Exact p-values are reported when provided by the  
365 software.

366

## 367 **Results**

368 To create *SYNGAP1* null hiPSCs, we performed CRISPR editing of a common exon within the  
369 human locus. Exon 7 was targeted (**Fig. 1A**) for non-homologous end joining (NHEJ) repair for  
370 the following reasons: 1) it is a common exon present in most, if not all, *SYNGAP1* transcripts  
371 (McMahon et al., 2012; Gou et al., 2020); 2) it is downstream of multiple stop-gain or small indel  
372 patient-specific variants (Jimenez-Gomez et al., 2019); 3) targeting it in other species results in  
373 ablation of SynGAP protein (Kim et al., 2003; Clement et al., 2012). Four single cell clones were  
374 identified and selected for downstream analysis. These clones contained either an edited (KO -  
375 Clone #4 and #38) or unedited (WT- Clone #6 and #30) Exon 7 (**Fig. 1A-B**). Sanger sequencing  
376 of the putative KO clones contained "clean" sequence both up and downstream of the Cas9 cut  
377 site. Importantly, karyotyping analysis (**Fig. 1C**) revealed no large alterations to chromosomal  
378 structure in any of the four clones. Moreover, each of the clones passed self-renewal and  
379 pluripotency checks and tested negative for mycoplasma contamination. The type of variants  
380 present, combined with the Sanger sequence traces, suggested that both clones contained bi-  
381 allelic indel frameshift variants, which would be expected to cause nonsense mediated decay of  
382 *SYNGAP1* transcripts and disruption to SynGAP protein. To test this prediction, glutamatergic  
383 neurons were produced from each of the four clones using the Ngn2 induction method (Zhang  
384 et al., 2013). After ~30-60 days of neuronal development, samples were immunoblotted for  
385 SynGAP protein levels. As predicted, neurons derived from both "KO" clones had significantly  
386 lower levels of SynGAP protein than "WT" clones. Reduced SynGAP signal was observed with  
387 antibodies recognizing either a core region of the protein (Pan-SynGAP), or to the C-terminus of  
388 a specific splice variant ( $\alpha 2$ ; **Fig. 1D-E**). Given that SynGAP signal is ~10% of control levels, the  
389 two KO clones appeared to produce iNeurons with nominal SynGAP protein expression.

390

391 We next performed whole exome sequencing (WES) to quantify the genetic differences among  
392 the clones. In general, the four clones had very little genetic drift across the protein coding  
393 portion of the genome. We observed only a few high confidence exonic small indels in each of

394 the four CRISPR clones (**Table 1**). None of these indels were shared within the same gene and  
395 none of them appeared to be homozygous, except for the two unique indels identified in Exon7  
396 of *SYNGAP1* (**Fig. 1F**). Thus, unbiased read-mapping of WES identified the sequences used to  
397 select the two “KO” clones and these sequences appeared to be the most significant deviations  
398 amongst the four clones (**Fig. 1A-B; Table 1**). Therefore, these four clones are essentially  
399 isogenic, with the exception of the homozygous disruptive variants present in *SYNGAP1*. We  
400 next performed in-depth mapping of *SYNGAP1* exons to further characterize potential off-target  
401 effects of Cas9 genome editing (**Fig. 1G**). Comparing normalized reads of each of the four  
402 clones relative to the original iPSC line revealed that *SYNGAP1* exon structure was largely  
403 intact. However, we did observe a ~50% reduction in mapped reads in the targeted exon of KO  
404 clone #38. Flanking exons had normal read depths (**Fig. 1H**). This was suggestive of a large  
405 deletion that encompassed exon 6/7, but was less than 4Kb in size. Genomic PCR failed to  
406 detect a band shift (**Fig. 1I**), though PCR amplification in this region was limited to ~2.2Kb.  
407 Thus, for clone #38, there were likely two distinct Indels in each of the *SYNGAP1* copies. Copy  
408 1 contained an 8bp deletion (**Fig. 1B; Table 1**), while the other copy likely contained an  
409 undefined indel (<4Kb) that prevented amplification by traditional PCR. In contrast, clone #4  
410 appeared to contain a bi-allelic single base deletion in exon 7. In each case, these indels  
411 produced nominal SynGAP protein in induced neurons (**Fig. 1D-E**). We conclude that the two  
412 “KO” clones, when paired with the isogenic “WT” clones, were suitable to determine the impact  
413 of SynGAP loss-of-function on human neuron development and function.

414

415 *Syngap1* loss-of-function in rodent neurons disrupts the maturation rate of dendrites and  
416 synapses. Therefore, we examined dendritic morphogenesis in developing iNeurons produced  
417 from each of the four human iPSC clones. Dendritic morphology was measured at day *in vitro*  
418 (DIV) 45 by tracing dendrites of sparsely labeled eGFP-positive iNeurons (**Fig. 2A**). Relative to  
419 each isogenic control line, total dendritic fields were substantially larger in iNeurons derived  
420 from *SYNGAP1*-KO clones. This difference was observed at the level of individual clones (**Fig.**  
421 **2A-B**) and when clones were grouped by genotype (**Fig. 2B**). Examination of the length by  
422 dendritic category (e.g. primary) revealed that, compared to WT clones, KO clones generally  
423 had longer primary and secondary dendrites (**Fig. 2A, C-E**). The lack of a clonal difference  
424 within tertiary dendrites likely reflected a lower statistical power, as many neurons lacked these  
425 structures. In contrast to length, the complexity of dendritic arbors was unaffected by *SYNGAP1*  
426 disruption. Clonal and genotype effects of *SYNGAP1* were not observed for total dendrites (**Fig.**  
427 **2F**). Moreover, no *SYNGAP1* effects were observed for each dendrite subtype (**Fig. 2G-I**).

428

429 Tracing studies suggested that reduced SynGAP expression leads to iNeurons with larger  
430 dendritic fields. To confirm this, we performed an orthogonal analysis, consisting of  
431 immunocytochemical labeling of dendritic and synaptic proteins, in neurons derived from one  
432 pair of isogenic WT or KO iPSCs (**Fig. 3A-B**). The MAP2 area was enhanced in KO cultures  
433 (**Fig. 3A-C**) and was not due to more KO neurons plated in these cultures (**Fig. 3A-E**). Cultured  
434 neurons with longer dendrites would be expected to have an increase in absolute numbers of  
435 postsynaptic structures. Indeed, absolute numbers of PSD95 and GLUA1 structures were also  
436 increased in the KO culture (**Fig. 3A-C**). The effect of genotype on synaptic labeling was still  
437 significant, albeit with a much smaller effect size, when PSD95 and GLUA1 structures were  
438 normalized to MAP2 area (**Fig. 3F**). These labeling studies support the idea that disrupting  
439 SynGAP expression results in cultures comprised of larger neurons with more postsynaptic  
440 structures.

441

442 The observation of larger iNeurons with increased numbers of postsynaptic structures prompted  
443 us to investigate the functional maturation of iNeurons with reduced SynGAP protein  
444 expression. Intrinsic membrane properties and the onset of glutamatergic synaptic activity are  
445 two measures that are developmentally regulated in Ngn2-induced neurons (Zhang et al.,  
446 2013). To test the idea that reducing SynGAP expression alters the maturation of iNeurons, we  
447 performed whole-cell voltage-clamp recordings at two developmental time points (*DIV20-30 and*  
448 *DIV40-50*; **Fig. 4A-B**). At DIV20-30, intrinsic membrane properties of all clones were  
449 characteristic of immature neurons (i.e. relatively low capacitance and high input resistance;  
450 **Fig. 4C-D**). We did not observe clonal or genotype differences in resting membrane potential,  
451 capacitance, or resistance at this time point (**Fig. 4C-E**). However, we did observe that neurons  
452 made from *SYNGAP1*-KO hiPSCs showed earlier synaptic activity during development.  
453 Although some iNeurons from all clones exhibited miniature excitatory postsynaptic currents  
454 (*mEPSCs*) at this time point (**Fig. 4F**), the proportion of *mEPSC*-expressing iNeurons was  
455 significantly increased in KO clones (**Fig. 4G**). When grouping iNeurons by genotype, KO  
456 neurons were almost twice as likely to express miniature events (**Fig. 4G**). *mEPSC* frequency  
457 was low and variable at this early time point, making it difficult to compare clones or even  
458 genotypes (**Fig. 4H-I**). In contrast, *mEPSC* amplitude was less variable. There appeared to be a  
459 weak clonal and genotype effect on *mEPSC* amplitude. Both KO amplitude populations  
460 exhibited a rightward shift compared to the two WT populations (**Fig. 4J**). When clonal data was



461 collapsed by genotype, a robust statistical effect emerged at the level of individual events and at  
462 the level of cellular population means (**Fig. 4J**).

463

464 We next analyzed synaptic activity in more mature iNeurons (*DIV40-50*; **Fig. 4L**). As a  
465 population, neurons derived from WT clones were roughly twice as likely to express synaptic  
466 activity at this time point compared to younger neurons of the same genotype, indicative of  
467 substantial neuronal maturation during this period (**Fig. 4G, M**). However, this effect was less  
468 pronounced in KO neurons (**Fig. 4G, M**). There was a significant effect of time on the proportion  
469 of neurons expressing synaptic activity in WT neurons, but this effect was absent in KO  
470 iNeurons (**Fig. 4M**). There was no longer an effect of genotype on the proportion of neurons  
471 with synaptic activity at the more mature stage of development. Within the population of neurons  
472 with synaptic events, we measured mEPSC frequency and amplitude. The frequency of events  
473 was highly variable in these populations (**Fig. 4N-O**), which made it difficult to draw clear  
474 conclusions across clones and genotypes. There was a trend toward more frequent events in  
475 combined KO populations, though these trends were not apparent when looking at individual  
476 clones. With respect to amplitude (**Fig. 4P-Q**), we once again observed a weak effect of clone  
477 and genotype at this timepoint that was consistent with observations from developmentally  
478 younger iNeurons. Neurons from both KO clones appeared to have slightly larger events  
479 compared to those from WT iNeurons. This effect was apparent in comparisons of mEPSC  
480 distributions of all events (**Fig. 4P-Q**), and in the much less sensitive approach of comparing  
481 event means from individual neurons (**Fig. 4P-Q, inset**).

482

483 The effect of SynGAP expression on iNeuron mEPSC frequency and amplitude was somewhat  
484 consistent across developmental time points, but the effect sizes, when present, were relatively  
485 small. To determine if these effects were reproducible, we performed an additional experiment  
486 on iNeurons produced from the same clones. Data for this experiment was collected from a  
487 completely new hiPSC expansion and neuronal induction procedure. In this additional  
488 experiment, we observed similar effects of SynGAP expression on intrinsic membrane  
489 properties and mEPSCs (**Fig. 5A-G**). *SYNGAP1* deletion did not affect the resting membrane  
490 potential, input resistance, or capacitance at the clonal or genotype level (**Fig. 5A-C**). Analysis  
491 of mEPSC frequency from each of the clones revealed a trend for increased frequency from  
492 neurons with disruptive *SYNGAP1* variants (**Fig. 5D**). The two KO clones have a greater  
493 frequency of mEPSCs when looking at cumulative probability distributions and this drove an  
494 effect at the genotype level (**Fig. 5E**). A statistical effect was not present when comparing

495 cellular means of mEPSC frequency. For mEPSC amplitude, the clonal and genotype effects  
496 were clearer compared to frequency measures. The cumulative distribution for mEPSC  
497 amplitudes for all events clearly shifted to larger values in both KO clones (**Fig. 5F**). This drove  
498 a substantial and highly significant shift in the disruption at the genotype level (**Fig. 5G**). We did  
499 not observe an effect on population means when looking at cellular averages. However, the  
500 power for this experiment was lower than the one presented in Figure 4. Taken together, we  
501 conclude that reducing SynGAP expression in Ngn2 iNeurons leads to weak, but reproducible,  
502 effects on mEPSC amplitude. Effects on frequency were unclear due to high variability.

503

504 Our data demonstrate that reducing SynGAP expression results in larger iNeurons that exhibit  
505 early synaptic maturity. Therefore, we hypothesized that reducing SynGAP expression would  
506 also influence the development of network activity in cultured iNeurons. To test this, we  
507 measured spontaneous distributed network activity in cultures derived from KO and WT clones  
508 using a multielectrode array (MEA) system (**Fig. 6A-C**). Recordings of the same cultures were  
509 performed over the course of several weeks, which enabled *in vitro* measurements of network  
510 spiking activity during neuronal development. From as early as week 2, we observed evidence  
511 of spiking activity in cultures derived from each of the iPSC clones. However, both *SYNGAP1*  
512 KO clones exhibited substantially increased firing rates compared to isogenic controls. The  
513 enhanced firing rate in KO iNeurons emerged progressively and was sustained through week  
514 six in culture at both clonal (**Fig. 6D**) and genotype levels (**Fig. 6E**). Next we measured bursting  
515 activity in each of the four clones. We observed significantly elevated neuronal bursts in KO vs  
516 control neurons (**Fig. 6F-G**). Quantification of distributed network connectivity demonstrated that  
517 KO neuronal cultures displayed different degrees of neural network activity, observed as  
518 “network bursts”, as early as 3 weeks of maturation. Enhanced network bursting activity in KO  
519 cultures relative to WT controls was observed at both the clonal (**Fig. 6H**) and genotype levels  
520 (**Fig. 6I**). Thus, *SYNGAP1* expression substantially influences the dynamics of cellular activity in  
521 developing neuronal networks.

522

523

524 **Discussion**

525 We produced iNeurons from human hiPSCs with a disrupted *SYNGAP1* gene in an effort to  
526 understand how this gene shapes human neuron development and function. This is an  
527 important research question given that pathogenic *SYNGAP1* variants cause a complex  
528 neurodevelopmental disorder defined by early-onset epilepsy, cognitive impairment, and autistic  
529 features (Hamdan et al., 2011; Jimenez-Gomez et al., 2019; Vlaskamp et al., 2019; Satterstrom  
530 et al., 2020). We found that *SYNGAP1* regulates the postmitotic maturation of dendrites and  
531 synapses from human iNeurons. Cas9-mediated disruption of *SYNGAP1* expression enhanced  
532 dendritic morphogenesis, accelerated the acquisition of synaptic activity, and drove increased  
533 spiking activity measured in functionally connected two-dimensional iNeuron cultures. Our data  
534 indicate that loss of SynGAP protein expression was responsible for the dendrite and synapse  
535 maturation phenotypes observed in these cultures. Indeed, we observed consistent structural  
536 phenotypes at the level of individual clones that were subsequently grouped by genotype.  
537 Whole exome sequencing demonstrated that the only shared variants between the two KO  
538 clones were indels in the *SYNGAP1* gene, and immunoblotting confirmed that iNeurons derived  
539 from KO clones expressed nominal levels of SynGAP protein. Altered dendritic maturation was  
540 supported by data obtained from orthogonal experimental measures. We observed longer  
541 dendrites in eGFP-positive iNeurons, and an increased dendritic area measured from  
542 endogenous MAP2 signal. iNeurons derived from the KO hiPSC clone also exhibited an  
543 increase in the absolute density of postsynaptic structures, a finding consistent with a neuronal  
544 culture populated with neurons containing longer dendrites. Given that the length of dendrites  
545 and the density of postsynaptic structures in iNeurons increases over time in culture (Zhang et  
546 al., 2013), these data support the conclusion that SynGAP expression regulates the maturation  
547 rate of dendritic and synaptic structures in human iNeurons. This conclusion was also supported  
548 by clonal and genotype differences in synaptic activity between WT and KO iNeurons. Individual  
549 iNeurons have been shown to gradually acquire synaptic activity in the first several weeks in  
550 culture (Zhang et al., 2013; Nehme et al., 2018). However, we found that KO neurons  
551 expressed synaptic activity earlier in development compared to WT neurons.

552  
553 Distributed neuronal activity, measured by MEA analysis, confirmed that structural maturation of  
554 dendrites and early functional expression of synapse activity translated into increased network  
555 activity in KO cultures. Similar to what we observed in dendrites and synapses, measures of  
556 network activity normally observed in more mature WT cultures appeared at much earlier stages  
557 of development in neurons developed from KO clones. Activity was already substantially greater

558 in cultures derived from KO clones at two weeks, a time in development when there is very little  
559 activity present in WT cultures. In addition, statistical analysis of network activity that considered  
560 time as a factor demonstrated that the trajectory of neuronal activity was distinct in KO cultures  
561 compared to WT controls (Fig. 6). Indeed, activity increased at a much greater rate in KO  
562 cultures, compared to WTs, over the first several weeks of development. Networks formed from  
563 iNeurons exhibited bursting behavior as a function of time *in vitro*, with older cultures exhibiting  
564 more robust bursting behavior (Fischer). Network bursting is driven in part by increased  
565 functional synaptic connectivity among neurons (Suresh et al., 2016; Nehme et al., 2018). KO  
566 neurons extended dendrites more quickly and had greater numbers of postsynaptic structures.  
567 Thus, KO neurons would be expected to exhibit enhanced connectivity at younger ages  
568 compared to control cultures. Increased functional connectivity in KO networks, driven by longer  
569 dendrites with more synaptic structures likely contributed to the precocious onset of coordinated  
570 network bursting behavior observed in MEA experiments. The effects observed on network  
571 activity were apparent at the level of individual clones when grouped by *SYNGAP1* genotype.  
572 These data further strengthen the conclusion that loss of SynGAP protein drives effects on  
573 network activity and these data provide a possible neurobiological mechanism for why  
574 individuals with *SYNGAP1* mutations have such a high incidence of early onset pediatric  
575 seizures (Vlaskamp et al., 2019).

576  
577 Data implicating *SYNGAP1* expression on the structural and functional maturation of human  
578 neurons is consistent with known functions of this gene discovered from experimentation in  
579 mouse neurons (Kilinc et al., 2018). SynGAP protein is highly expressed in rodent neurons and  
580 is capable of bidirectional regulation of excitatory synapse strength. Overexpression of SynGAP  
581 protein suppresses excitatory synapse transmission by activating AMPA receptor internalization  
582 (Rumbaugh et al., 2006). One report indicates that SynGAP isoforms regulate synaptic strength  
583 in opposing directions (McMahon et al., 2012). However, genetic ablation of all *Syngap1* splice  
584 forms in mice, which removes expression of all protein isoforms, leads to increased excitatory  
585 synapse strength and early appearance of synaptic activity in glutamatergic neurons (Clement  
586 et al., 2012). These data indicate that the integrated function of all SynGAP proteins in  
587 developing mouse neurons is to suppress excitatory synapse function during development. Our  
588 findings in human neurons, which also ablated expression of human SynGAP isoforms, support  
589 this model of developmental *SYNGAP1* function. Given that we observed early and enhanced  
590 excitatory synapse function in KO iNeurons, human *SYNGAP1* also appears to slow the onset  
591 of excitatory synapse activity by suppressing excitatory synapse function.

592

593 The impact of *SYNGAP1* on human neuron dendritic maturation is also consistent with  
594 observations in rodent neurons. The effect of SynGAP protein expression on rodent neuron  
595 dendritic development is complex and depends on the type of neuron and brain area studied.  
596 *Syngap1* heterozygous KO mice have well documented impairments in dendritic morphogenesis  
597 that is linked to alterations in neural circuit assembly and neuronal connectivity. Layer 5 (L5)  
598 neurons in the somatosensory cortex of these mutant mice undergo a form of accelerated post-  
599 mitotic differentiation, where dendritic extension proceeds at a quicker pace compared to WT  
600 mice (Aceti et al., 2015). Interestingly, these neurons also undergo premature spine  
601 morphogenesis and early spine pruning. These observations, combined with a  
602 desynchronization of L5 cell body and dendritic arbor growth, strongly indicate that SynGAP  
603 expression acts in these neurons to suppress a differentiation program that stimulates neuronal  
604 maturation. In contrast to these findings, neurons in the upper lamina (Layers 2-4) of the  
605 somatosensory cortex of *Syngap1* KO mice show the opposite phenotype. These neurons  
606 undergo a form of arrested development where dendritic arbors are shorter compared to similar  
607 neurons in WT littermates (Michaelson et al., 2018). Neurons with shorter dendritic arbors also  
608 had fewer dendritic spines and these structural alterations impacted connectivity within  
609 somatosensory cortex circuits. While our studies in human iNeurons support a role for  
610 *SYNGAP1* to suppress dendritic maturation, the specific effect of the gene on structural  
611 maturation may also be dependent on the type of human neuron. Two-dimensional neuronal  
612 cultures lack the cellular complexity of neural networks found in the intact nervous system. It will  
613 be of considerable interest to assess how loss of *SYNGAP1* expression impacts various types  
614 of genetically and morphologically distinct neurons formed in three-dimensional human culture  
615 systems, such as organoids, and how alterations to dendritic morphogenesis may contribute to  
616 impaired neural circuit connectivity and development of network activity.

617

## 618 **Acknowledgments**

619 **Funding:** This work was supported in part by NIH grants from the National Institute of Mental  
620 Health (MH096847 and MH108408 to G.R.) and the National Institute for Neurological Disorders  
621 and Stroke (NS064079 and NS110307 to G.R. and NS091381 to J.H.). N.L. was supported by a  
622 generous postdoctoral training fellowship and J.H. by a grant from the SynGAP Research Fund  
623 (SRF; <https://syngapresearchfund.org>). This work was supported by Grant 201763 from the  
624 Doris Duke Charitable Foundation to J.H. V.A. was supported by a generous postdoctoral

625 training fellowship from Leon and Friends e.V (<https://leonandfriends.org>). L.B. was partially  
626 supported by a travel grant for junior researchers from Boehringer Ingelheim Fonds (BIF). J.H.  
627 also received generous support from the Robbins Foundation and Mr. Charif Souki.

628 **Author Contributions:** N.L. performed experiments, designed experiments, analyzed data, co-  
629 wrote and edited the manuscript. V.A, R. V., M.K., L.B., C.R., A.R., C.H., B.S., and E.W.  
630 performed experiments, analyzed data and interpreted data. G.R. conceived project, designed  
631 experiments, interpreted data, and co-wrote the manuscript. D.R.P., L.S., T.P.S., C.A.M., and  
632 J.L.H. designed and interpreted experiments and edited the manuscript.

633 **Competing interests:** E.W. and D.R.P. are employed by Thermo Fisher Scientific. The authors  
634 declare no competing interests.

635 **Data and materials availability:** hiPSC clones and data supporting the findings of this study  
636 are available from the corresponding author upon reasonable request.



637 **Figures and Legends**

**Figure 1**

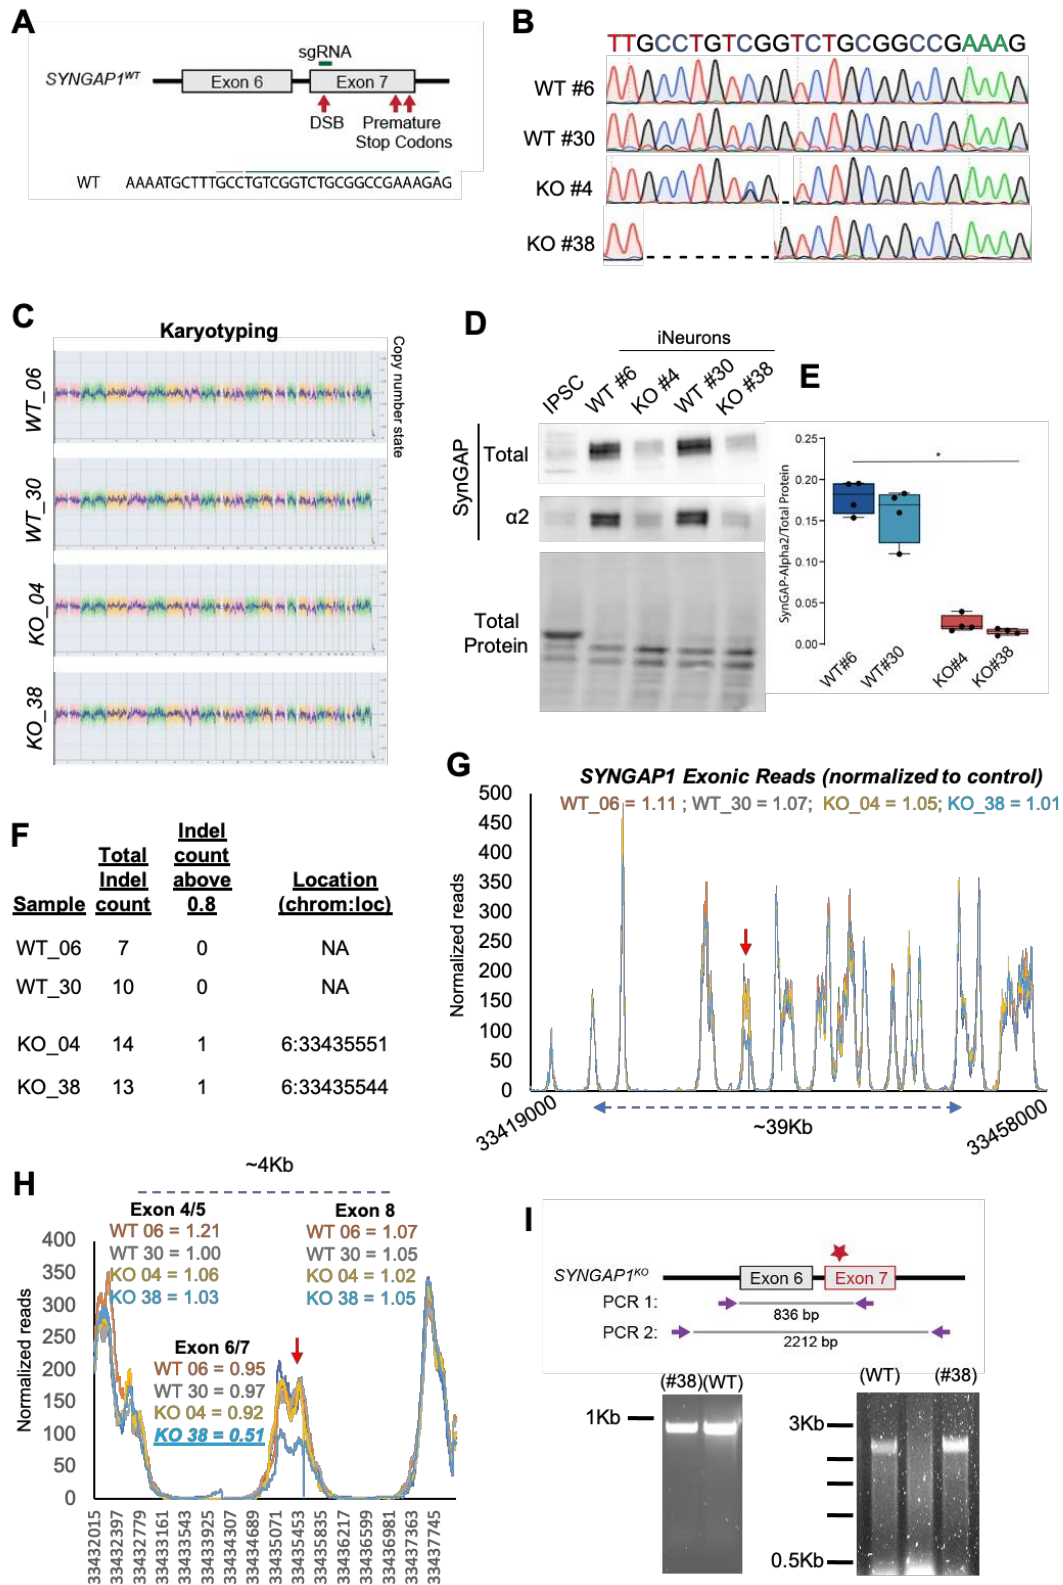

638

639 **Figure 1. Development of isogenic SYNGAP1 knockout hiPSCs.**

640 **(A)** Cartoon showing clone-specific mutations in the *SYNGAP1* gene. **(B)** Sanger sequencing  
641 for one WT clone and two *SYNGAP1* mutant clones derived from the CRISPR experiment. **(C)**  
642 Whole genome view of iNeurons from WT#6, WT#30, KO#4 and KO#38 clones depicting a  
643 copy number value of 2 cross all chromosomes (except for the Y-chromosome which is not  
644 detected) revealing normal (female) karyotype with no chromosomal aberrations. The pink,  
645 green and yellow colors indicate the raw signal for each individual chromosome probe, while the  
646 blue signal represents the normalized probe signal which is used to identify copy number and  
647 aberrations (if any). **(D)** Western blots demonstrating SynGAP protein expression from iNeuron  
648 or iPSC homogenate. Total refers to signal from an antibody that detects all splice variants and  
649  $\alpha 2$  refers to signal from an antibody that detects only a specific C-terminal splice variant. **(E)**  
650 Quantification of relative intensity of bands normalized to total protein signal. One-way ANOVA  
651 with a Kruskal-Wallis test multiple comparisons test  $H(3)=12.29$ ,  $p=0.0001$ ; WT#6 vs KO#4:  
652  $p=0.1876$ ; WT#6 vs WT#30:  $p>0.9999$ ; WT#6 vs KO#38:  $p=0.0140$ ; KO#4 vs WT#30:  $p=0.5258$ ;  
653 KO#4 vs KO#38:  $p>0.9999$ ; WT#30 vs KO#38:  $p=0.0561$ .  $n=4$  per group. In box-and-whisker  
654 plot, the center, boxes and whiskers represent the median, interquartile range, and min to max,  
655 respectively. **(F)** Indels from each clone identified from whole exome sequencing analysis.  
656 Indels were identified by clonal sequence differences from the original Cas9 hiPSCs (reference  
657 sequence). Indel threshold was determined by at least 50% of the reads differing from the  
658 reference sequence with a minimum of at least ten reads. Indels w/ frequency above 0.8 were  
659 used to determine frequency of homozygous variants. **(G)** Normalized mapped reads from the  
660 entire coding sequence of the *SYNGAP1* gene in the four clones hiPSCs. Red arrow denotes  
661 predicted Cas9 cut site. Numbers reflect clonal reads relative to Cas9 hiPSC reads. **(H)**  
662 Normalized mapped reads for the same samples around the Cas9 target sequence. **(I)** Genomic  
663 PCR to amplify DNA sequence flanking the Cas9 target site.

664

## Figure 2

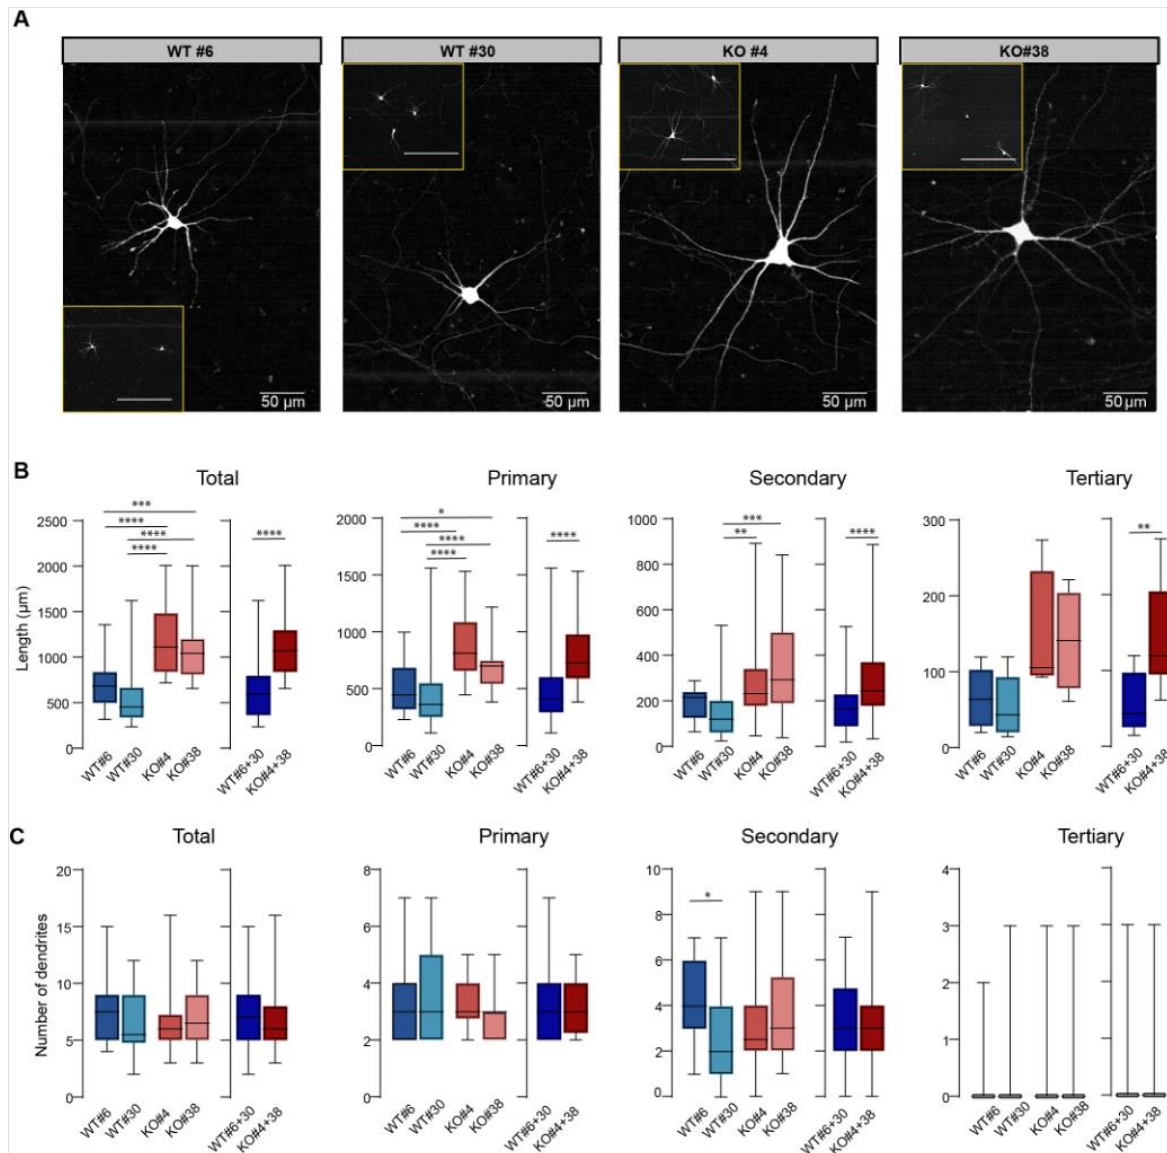

665

666 **Figure 2. Increased dendrite length in iNeurons derived from KO iPSC clones. (A)**

667 Representative images of eGFP-expressing iNeurons from the four different clones at DIV45

668 (inset images scale bars: 200  $\mu\text{m}$ ). (B-E) Histograms depicting average length per cell of total

669 (B), primary (C), secondary (D) and tertiary dendrites (E) of the four clones (*Total dendrites* -

670 clonal analysis  $H=54.81$ ,  $p<0.0001$ ;  $N=30$  cells per clone; Genotype analysis  $U=436$ ,  $p<0.0001$ ;

671  $N=60$  cells per genotype; *Primary dendrites* - Clonal analysis  $H=49.71$ ,  $p<0.0001$ ,  $N=30$  cells

672 per clone; Genotype analysis  $U=545$ ,  $p<0.0001$ ,  $N=60$  cells per genotype; *Secondary dendrites*

673 - Clonal analysis  $H=20.45$ ,  $p<0.0001$ ;  $N=30$  cells for WT#6 and KO#38;  $N=26$  cells for WT#30;

674  $N=27$  cells from KO#4; Genotype analysis  $U=880$ ,  $p<0.0001$ ;  $N=56$  cells from WT genotype;

675 N=57 cells from KO genotype; *Tertiary dendrites* – Clonal Analysis, H=7.115, p=0.0683; N=6  
676 dendrites of 30 cells from WT#6, n=5 dendrites of 30 cells from WT#30, n=4 dendrites of 30  
677 cells from KO#4 and n=4 dendrites of 30 cells from KO#38; Genotype analysis, U=73.55,  
678 p=0.0068; N=11 cells from WT genotype; N=8 cells from KO genotype). (F-I) Graphs showing  
679 average number of dendrites per cell of total (F), primary (G), secondary (H) and tertiary (I)  
680 dendrites of the four clones (*Total dendrites* – Clonal analysis, H=5.957, p=0.1137; N=30 cells  
681 per clone; Genotype analysis, U=1613, p=0.3222; N=60 cells per genotype; *Primary dendrites* –  
682 H=1.680, p=0.6413, n=30 cells per clone; Genotype analysis, U=1639, p=0.3755, n=60 cells per  
683 genotype; *Secondary dendrites* – Clonal analysis, H=10.72, p=0.0133, n=30 cells per clone for  
684 clone comparisons; Genotype analysis, U=1689, p=0.5552, n=60 cells per genotype; *Tertiary*  
685 *dendrites* – Clonal analysis, H=0.4531, p=0.9291, n=30; Genotype analysis, U=1731, p=0.6129,  
686 n=60 cells per genotype). In box-and-whisker plots, the center, boxes and whiskers represent  
687 the median, interquartile range, and min to max, respectively. \*p<0.05, \*\*p<0.01, \*\*\*\*p<0.0001.

688

## Figure 3

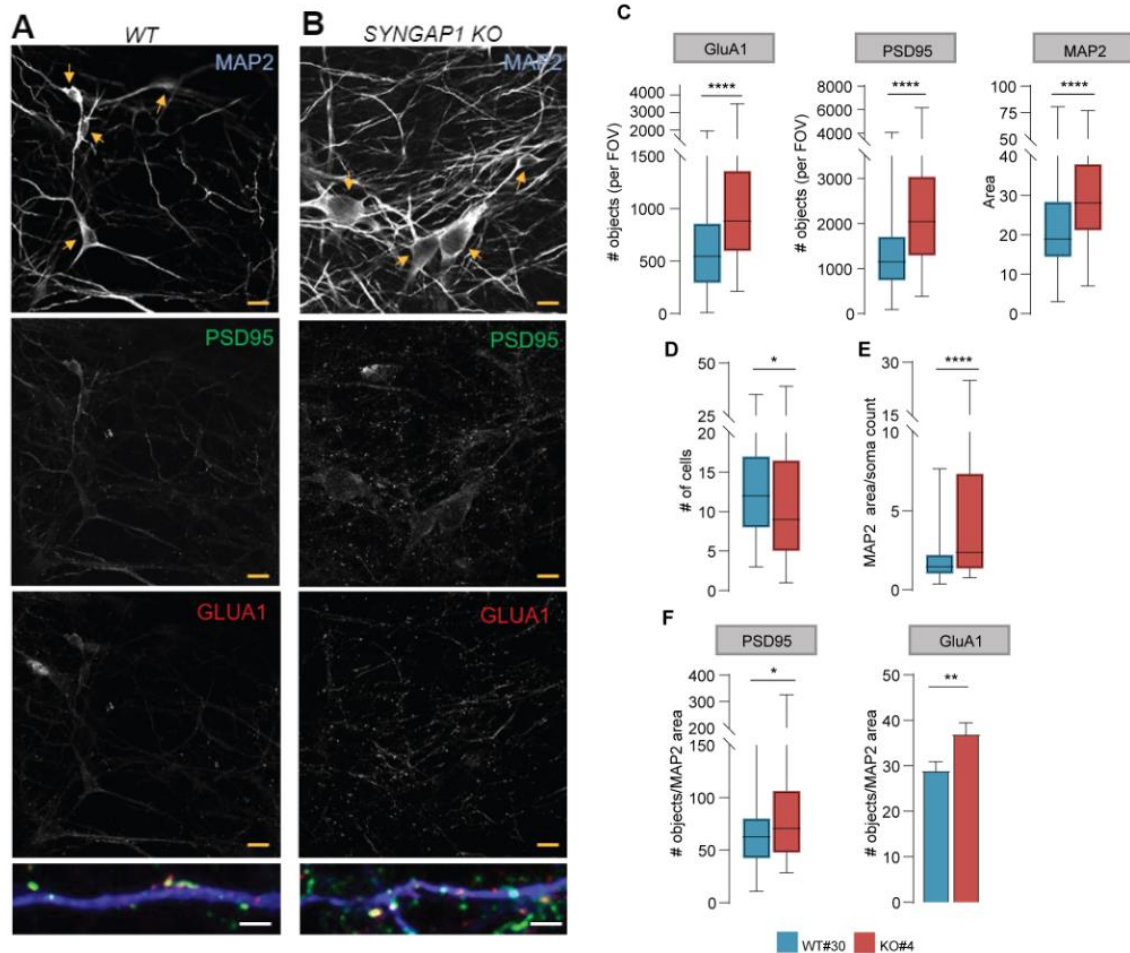

689

690 **Figure 3. Increased dendritic area and more numerous postsynaptic structures in**  
 691 **SYNGAP1 KO iNeurons.** (A-B) Representative images showing MAP2 labeling (top), PSD95  
 692 labeling (middle), and GluA1 labeling (middle-bottom), and merge of MAP2, PSD95 and GLUA1  
 693 (bottom) of iNeurons from WT#30 (A) and KO#4 (B) at DIV45. Yellow arrows indicate cell  
 694 bodies. Yellow scale bar is 10 μm and white is 2 μm. (C) Graphs showing MAP2 area and  
 695 number of PSD95 objects (punctate labeling) per field of view (FOV) in WT#30 and KO#4.  
 696 (MAP2 comparison: U=2181, p<0.0001 N=85 images for WT#30 and 81 images for KO#4;  
 697 PSD95 comparison: U=1891, p<0.0001 N=85 for WT#30 and 81 for KO#4; GluA1 comparison:  
 698 U=1999, p<0.0001 N=85 for WT#30 and 81 for KO#4) (D) Averaged number of cells in FOVs  
 699 WT#30 and KO#4 (U=2746, p=0.0240 N=85 for WT#30 and 81 for KO#4). (E) MAP2 area by  
 700 soma count (U=2097, p<0.0001 N=85 for WT#30 and 81 for KO#4). (F) Graphs showing  
 701 quantification of PSD95 and GluA1 expression in WT#30 and KO#4 normalized to MAP2 area  
 702 (PSD95 objects/MAP2 area comparison: U=2752, p=0.0255 N=85 for WT#30 and 81 for KO#4;

703 GluA1 objects/MAP2 area comparison:  $t_{(164)}=2666$ ,  $p=0.0084$  N=85 for WT#30 and 81 for  
704 KO#4). In box-and-whisker plots, the center, boxes and whiskers represent the median,  
705 interquartile range, and min to max, respectively. Bar graph represents mean  $\pm$  SEM. \* $p<0.05$ ,  
706 \*\* $p<0.01$  and \*\*\*\* $p<0.0001$

707

708



Figure 4

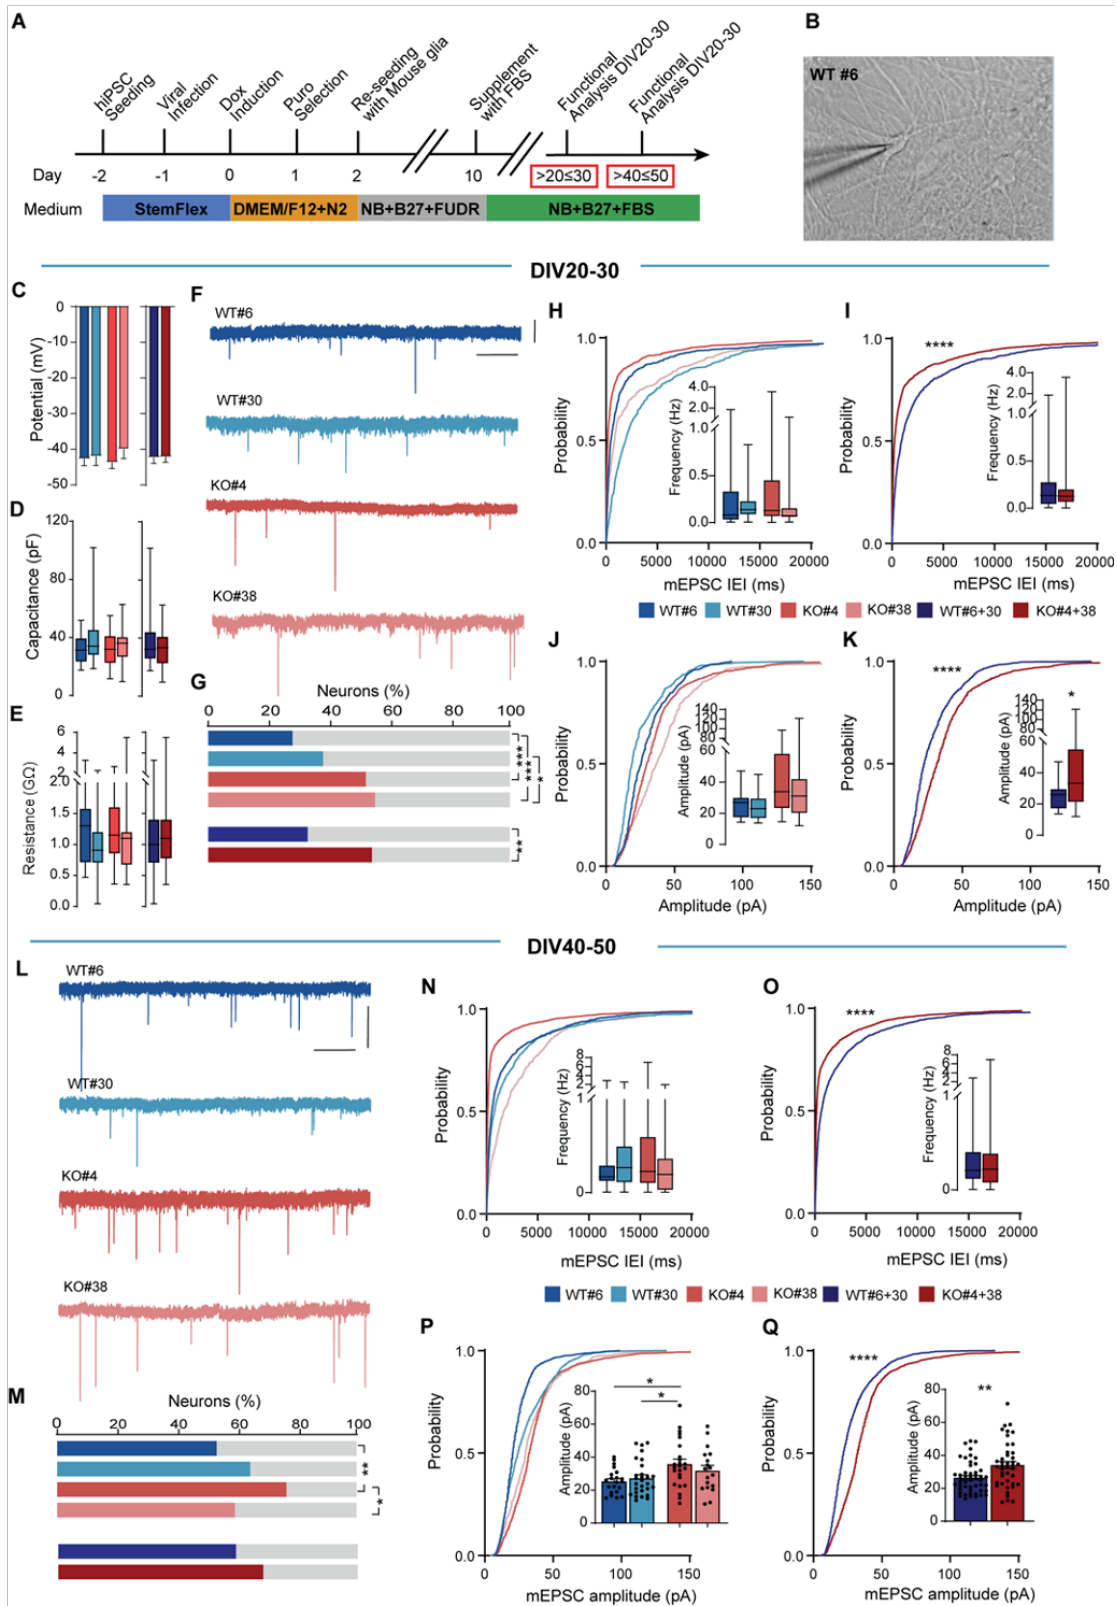

709

710 **Figure 4. SYNGAP1 expression in human iNeurons regulates excitatory synapse**  
711 **function. (A)** Flow diagram of iNeuron generation from WT and SYNGAP1 KO iPSCs for  
712 whole-cell electrophysiological experiments (recording days within red boxes). **(B)**  
713 Representative DIC image of patched iNeurons cells from WT#6. (C-E) Bar graphs representing  
714 intrinsic membrane properties measured at DIV20-30 as resting membrane potential **(C)**,  
715 capacitance **(D)** and input resistance **(E)** from the four clones (*Membrane potential* – Clonal  
716 analysis,  $F_{(3,95)}=0.5132$ ,  $p=0.6742$ ,  $n=29$  cells from WT#6, 31 cells from WT#30, 34 cells from  
717 KO#4 and 21 cells from KO#38; Genotype analysis,  $t_{(97)}=0.08684$ ,  $p=0.9310$ ,  $n=51$  cells for  
718 WT#6+30 and 48 for KO#4+38; *Capacitance* – Clonal analysis,  $H=3.123$ ,  $p=0.3730$ ,  $n=29$  cells  
719 from WT#6, 31 cells from WT#30, 34 cells from KO#4 and 21 cells from KO#38; Genotype  
720 analysis,  $U=1584$ ,  $p=0.5093$ ;  $N=62$  cells from WT#6+30 and 55 cells from KO#4+38 ;  
721 *Membrane resistance*– Clonal analysis,  $H=4.259$ ,  $p=0.2348$ ,  $n=28$  cells from WT#6, 31 cells  
722 from WT#30, 34 cells from KO#4 and 21 cells from KO#38; Genotype analysis,  $U=1546$ ,  
723  $p=0.5619$ ;  $N=60$  cells from WT#6+30 and 55 cells from KO#4+38). **(F)** Representative traces of  
724 mEPSCs of iNeurons from WT and KO clones at DIV20-30. Scale bars 2 s, 20pA. **(G)**  
725 Percentage of successful observations of mEPSCs in iNeurons from the four clones at DIV20-  
726 30 (Clonal analysis,  $p=0.0008$  for KO#4 vs WT#6;  $p=0.0002$  for KO#38 vs WT#6,  $p=0.0644$  for  
727 KO#4 vs WT#30,  $n=20$  for KO#4 and 18 for WT#30, resp;  $p=0.0231$  for KO#38 vs WT#30;  $N=$   
728 12 cells from WT#6, 18 cells from WT#30, 20 cells from KO#4 and 19 cells from KO#38;  
729 Genotype analysis,  $p=0.0042$  for KO#4+38 vs WT#6+30,  $n=30$  cells from WT#6+30 and 39 cells  
730 from KO#4+38). (H- I) Cumulative plots of mEPSC interevent-interval and frequency (inset) of  
731 the different clones individually **(H)** and grouped by genotype **(I)** at DIV20-30 (Clonal analysis,  
732  $H=1.910$ ,  $p=0.5912$ ,  $n=12$  cells from WT#6, 18 cells from WT#30, 20 cells from KO#4 and 19  
733 cells from KO#38; Genotype analysis,  $U=504.5$ ,  $p=0.5607$ ;  $N=29$  cells from WT#6+30 and 38  
734 cells from KO#4+38, K-S test  $D=0.2660$ ,  $p<0.0001$ ,  $n= 951$  events from 29 cells from WT#6+30,  
735  $n= 1559$  events from 38 cells from KO#4+38). (J-K) Cumulative probability plots of mEPSC  
736 amplitude of the different clones individually **(J)** and grouped by genotype **(K)** at DIV20-30  
737 (Clonal analysis,  $H=7.565$ ,  $p=0.0559$ ,  $n=15$  cells from WT#6, 20 cells from WT#30, 19 cells from  
738 KO#4 and 19 cells from KO#38; Genotype analysis,  $U=504.5$ ,  $p=0.5607$ ;  $N=29$  cells from  
739 WT#6+30 and 38 cells from KO#4+38, K-S test  $D=0.2660$ ,  $p<0.0001$ ,  $n= 981$  events from 35  
740 cells from WT#6+30,  $n= 1601$  events from 38 cells from KO#4+38). **(L)** Representative traces of  
741 mEPSCs of iNeurons from WT and KO clones at DIV40-50. Scale bars 2 s, 20pA. **(M)**  
742 Percentage of successful observations of mEPSCs in iNeurons from the four clones at DIV40-  
743 50 (Clonal analysis,  $p=0.0011$  for WT#6 vs KO#4;  $p=0.4764$  for WT#6 vs KO#38;  $p=0.0892$  for

744 WT#30 vs KO#4;  $p=0.5612$  for WT#30 vs KO#38;  $p=0.1511$  for WT#6 vs WT#30;  $p=0.0154$  for  
745 KO#4 vs KO#38;  $N=21$  cells from WT#6, 29 cells from WT#30, 25 cells from KO#4 and 18 cells  
746 from KO#38; Genotype analysis,  $p=0.2399$  for WT#6+30 vs KO#4+38;  $N=50$  cells from  
747 WT#6+30 and 43 cells from KO#4+38; Effect of time,  $p=0.0004$  for WT#6+30 p40 vs p20;  $p=$   
748  $p=0.0592$  for KO#4+38 p40-50 vs p20-30. (N-O) Cumulative probability plots of mEPSC  
749 interevent-interval (IEI) and frequency (inset) of the different clones individually (**N**) and grouped  
750 by genotype (**O**) at DIV40-50 (Clonal analysis,  $H=2.874$ ,  $p=0.4115$ ,  $n=21$  cells from WT#6, 28  
751 cells from WT#30, 24 cells from KO#4 and 18 cells from KO#38; Genotype analysis,  $U=970.5$ ,  
752  $p=0.644$ ;  $N=49$  cells from WT#6+30 and  $n=42$  cells from KO#4+38, K-S test  $D=0.2763$ ,  
753  $p<0.0001$ ,  $n=2182$  events from 49 cells from WT#6+30,  $n=2498$  events from 42 cells from  
754 KO#4+38). (P-Q) Cumulative probability plots of mEPSC amplitude of the different clones  
755 individually (**P**) and grouped by genotype (**Q**) at DIV40-50 (Clonal analysis,  $F_{(3,87)}=3.73$ ,  
756  $p=0.0142$ ,  $p=0.0187$  for KO#4 vs WT#6,  $p=0.0499$  for KO#4 vs WT#30,  $p=0.9407$  for WT#6 vs  
757 WT#30;  $p=0.3151$  for WT#6 vs KO#38;  $p=0.5696$  for WT#30 vs KO#4 and  $p=0.70$  for KO#4 vs  
758 KO#38; Genotype analysis,  $t_{(89)}=3.121$ ,  $p=0.0024$ ,  $n=49$  cells for WT#6+30 and 42 for KO#4+38,  
759 K-S test  $D=0.2990$ ,  $p<0.0001$ ,  $n=2254$  events from 49 cells from WT#6+30,  $n=2554$  events  
760 from 42 cells from KO#4+38). In box-and-whisker plots, the center, boxes and whiskers  
761 represent the median, interquartile range, and min to max, respectively. Bar graphs represent  
762 mean  $\pm$  SEM. \* $p<0.05$ , \*\* $p<0.01$

763

## Figure 5

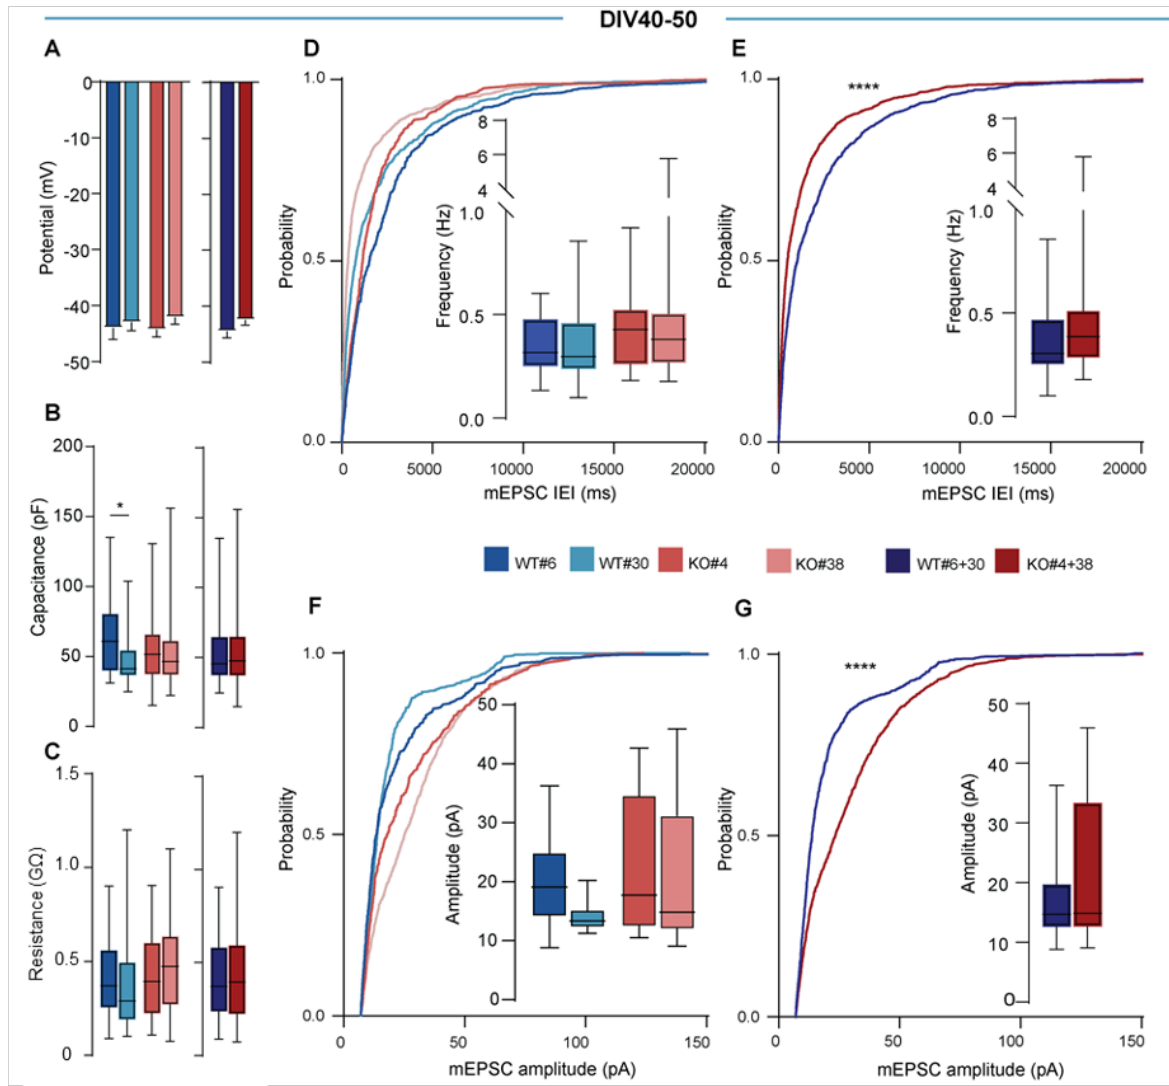

764

765 **Figure 5. Reproducibility of SYNGAP1-mediated effects on iNeuron excitatory synapse**

766 **function.** (A-C) Graphs showing resting membrane potential (A), capacitance (B) and input

767 resistance (C) from the four clones at DIV40-50 (*Membrane potential* – Clonal analysis,

768  $F_{(3,54)}=0.5456$ ,  $p=0.6532$ ,  $n=11$  cells from WT#6, 16 cells from WT#30, 13 cells from KO#4 and

769 18 cells from KO#38; Genotype analysis,  $t_{(56)}=1.215$ ,  $p=0.2295$ ,  $n=27$  cells for WT#6+30 and 21

770 for KO#4+38; *Capacitance* – Clonal analysis,  $H=9.091$ ,  $p=0.0281$ ,  $p=0.0318$  for WT#6 vs

771 WT#30,  $n=28$  cells from WT#6, 41 cells from WT#30, 34 cells from KO#4 and 50 cells from

772 KO#38; Genotype analysis,  $U=2828$ ,  $p=0.7973$ ;  $N=69$  cells from WT#6+30 and 84 cells from

773 KO#4+38; *Membrane resistance*– Clonal analysis,  $H=4.738$ ,  $p=0.1920$ ,  $n=28$  cells from WT#6,

774 41 cells from WT#30, 34 cells from KO#4 and 50 cells from KO#38; Genotype analysis,

775  $U=2896$ ,  $p=0.9949$ ;  $N=69$  cells from WT#6+30 and 84 cells from KO#4+38 ).(D-E) Cumulative

776 plots of mEPSC interevent-interval (IEI) and frequency (inset) of the different clones individually  
777 **(D)** and grouped by genotype **(E)** at DIV40-50 (Clonal analysis,  $H=1.663$ ,  $p=0.6452$ ,  $n=11$  cells  
778 from WT#6, 9 cells from WT#30, 8 cells from KO#4 and 13 cells from KO#38; Genotype  
779 analysis,  $U=164$ ,  $p=0.2382$ ;  $N=20$  cells from WT#6+30 and  $n=21$  cells from KO#4+38, K-S test  
780  $D=0.1744$ ,  $p<0.0001$ ,  $n=1199$  events from 20 cells from WT#6+30,  $n=1512$  events from 21  
781 cells from KO#4+38). (F-G) Cumulative probability plots of mEPSC amplitude of the different  
782 clones individually **(F)** and grouped by genotype **(G)** at DIV40-50 (Clonal analysis,  $H=3.080$ ,  
783  $p=0.3795$ ,  $n=11$  cells from WT#6, 9 cells from WT#30, 8 cells from KO#4 and 13 cells from  
784 KO#38; Genotype analysis,  $U=182$ ,  $p=0.4773$ ;  $N=20$  cells from WT#6+30 and  $n=21$  cells from  
785 KO#4+38, K-S test  $D=0.2954$ ,  $p<0.0001$ ,  $n=1085$  events from 20 cells from WT#6+30,  $n=1396$   
786 events from 21 cells from KO#4+38). In box-and-whisker plots, the center, boxes and whiskers  
787 represent the median, interquartile range, and min to max, respectively. Bar graphs represent  
788 mean  $\pm$  SEM. \* $p<0.05$ .

789

Figure 6

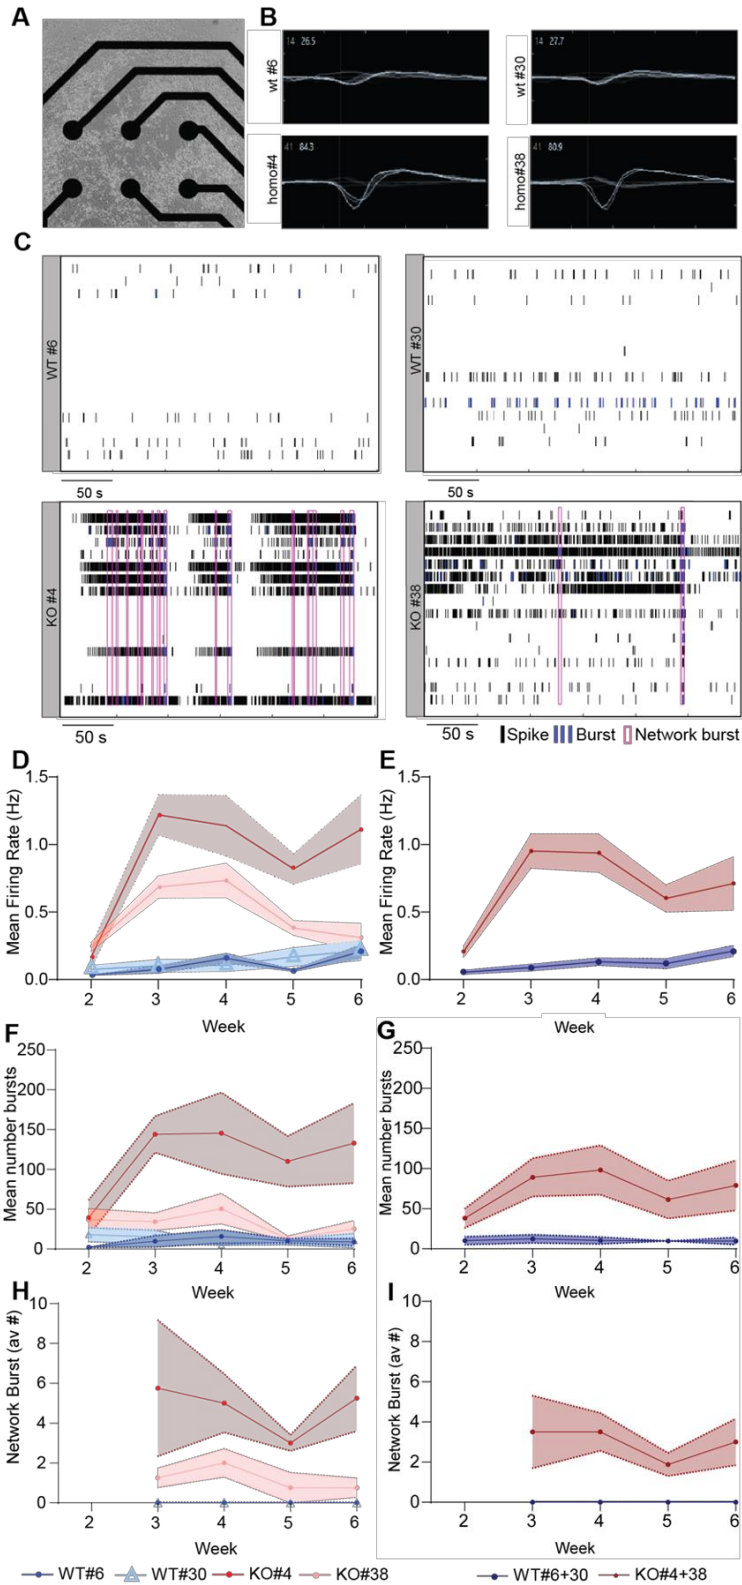

790



791 **Figure 6. Earlier onset and elevated levels of network activity in SYNGAP1 KO iNeurons.**

792 **(A)** Representative bright-field image of 1-week old iNeurons differentiated from iPSC-  
793 derived NPCs plated on a 16-electrode array of an MEA well. Spontaneous action potentials  
794 were recorded from the homozygous SYNGAP1 null (Homo#4 and #30) and control (WT#6 and  
795 #30) neurons. **(B)** Representative wave forms of spiking behavior from a single  
796 electrode for each Homo and WT neuronal culture. **(C)** Representative temporal raster  
797 plots of KO iNeurons (KO#4 and #38) and WT isogenic control iNeurons (WT#6 and #30)  
798 over 5-minutes of continuous recording during culture week 3. (D-E) Cumulative plots of mean  
799 firing rates for all four clones individually **(D)** and grouped together by genotype **(E)**, along a  
800 developmental timeline. (F-G) Cumulative plots of average number of bursts for individual  
801 clones **(F)** and grouped together by genotype **(G)**. (H-I) Cumulative plots of average number of  
802 network bursts for all clone individually **(H)** and grouped together by genotype **(I)**. KO neurons  
803 display synaptic connections as early as week 3 of maturation compared to the WT  
804 controls. (*Week 2* – Clonal analysis,  $H=9.331$ ,  $p=0.0096$ , post-hoc comparisons  $p=0.0227$  for  
805 KO#38 vs WT#6,  $p>0.999$  for WT#6 vs WT#30;  $p=0.2697$  for WT#6 vs KO#4;  $p>0.9999$  for  
806 KO#4 vs KO#38 and  $p=0.999$  for WT#30 vs KO#4 and  $p=0.3803$  for WT#30 vs KO#38;  
807 Genotype analysis,  $U=6$ ,  $p=0.0047$ ; *Week 3* –  $H=12.73$   $p<0.0001$ , post-hoc comparisons  
808  $p=0.0140$  for KO#4 vs WT#6,  $p=0.0227$  for KO#4 vs WT#30; Genotype analysis  $U=0$ ,  $p=0.0002$ ;  
809 *Week 4* – Clonal analysis,  $H=12.29$   $p=0.0001$ , post-hoc comparisons  $p=0.01410$  for KO#4 vs  
810 WT#30; Genotype analysis,  $U=0$ ,  $p=0.0002$ ; *Week 5* – Clonal analysis,  $H=11.89$   $p=0.0004$ ,  
811 post-hoc comparisons  $p=0.0084$  for KO#4 vs WT#6; Genotype analysis,  $U=2$ ,  $p=0.0006$ ; *Week*  
812 *6* –  $H=9.088$ ,  $p=0.0117$ ; post-hoc comparisons  $p=0.0451$  for KO#4 vs WT#6; Genotype  
813 analysis,  $U=10$ ,  $p=0.0207$ ).  $N=4$  replicas for WT#6, WT#30, KO#4 and KO#38;  $N=8$  replicas  
814 from WT#6+30 and KO#4+38. For each clone, four replicates of iNeurons were plated and  
815 differentiated concurrently. Bar graph represents mean  $\pm$  SEM. \* $p<0.05$ , \*\* $p<0.01$ , \*\*\* $p<0.001$   
816 and \*\*\*\* $p<0.0001$ .

817

818

819  
820  
821  
822  
823  
824  
825  
826  
827  
828  
829  
830  
831  
832  
833  
834  
835  
836  
837  
838  
839  
840  
841  
842  
843  
844  
845  
846  
847  
848  
849  
850  
851  
852  
853  
854  
855  
856  
857  
858  
859  
860  
861  
862  
863  
864  
865  
866  
867  
868  
869

## References

- Aceti M, Creson TK, Vaissiere T, Rojas C, Huang WC, Wang YX, Petralia RS, Page DT, Miller CA, Rumbaugh G (2015) Syngap1 haploinsufficiency damages a postnatal critical period of pyramidal cell structural maturation linked to cortical circuit assembly. *Biological psychiatry* 77:805-815.
- Berryer MH et al. (2013) Mutations in SYNGAP1 cause intellectual disability, autism, and a specific form of epilepsy by inducing haploinsufficiency. *Human mutation* 34:385-394.
- Carvill GL et al. (2013) Targeted resequencing in epileptic encephalopathies identifies de novo mutations in CHD2 and SYNGAP1. *Nat Genet* 45:825-830.
- Charrier C, Joshi K, Coutinho-Budd J, Kim JE, Lambert N, de Marchena J, Jin WL, Vanderhaeghen P, Ghosh A, Sassa T, Polleux F (2012) Inhibition of SRGAP2 function by its human-specific paralogs induces neoteny during spine maturation. *Cell* 149:923-935.
- Clement JP, Ozkan ED, Aceti M, Miller CA, Rumbaugh G (2013) SYNGAP1 links the maturation rate of excitatory synapses to the duration of critical-period synaptic plasticity. *J Neurosci* 33:10447-10452.
- Clement JP, Aceti M, Creson TK, Ozkan ED, Shi Y, Reish NJ, Almonte AG, Miller BH, Wiltgen BJ, Miller CA, Xu X, Rumbaugh G (2012) Pathogenic SYNGAP1 mutations impair cognitive development by disrupting maturation of dendritic spine synapses. *Cell* 151:709-723.
- Deciphering Developmental Disorders S (2015) Large-scale discovery of novel genetic causes of developmental disorders. *Nature* 519:223-228.
- Deciphering Developmental Disorders S (2017) Prevalence and architecture of de novo mutations in developmental disorders. *Nature* 542:433-438.
- Fischer SKrnGF Multielectrode array recordings of human iPSC-derived neurons reveal differences in network activity depending on differentiation protocol and genome modification. *Cellular Neuroscience Archive*.
- Gamache TR, Araki Y, Hugarir RL (2020) Twenty Years of SynGAP Research: From Synapses to Cognition. *J Neurosci* 40:1596-1605.
- Gou G, Roca-Fernandez A, Kilinc M, Serrano E, Reig-Viader R, Araki Y, Hugarir RL, de Quintana-Schmidt C, Rumbaugh G, Bayés À (2020) SynGAP splice variants display heterogeneous spatio-temporal expression and subcellular distribution in the developing mammalian brain. *Journal of Neurochemistry* n/a.
- Hamdan FF, Daoud H, Piton A, Gauthier J, Dobrzyniecka S, Krebs MO, Joobor R, Lacaille JC, Nadeau A, Milunsky JM, Wang Z, Carmant L, Mottron L, Beauchamp MH, Rouleau GA, Michaud JL (2011) De novo SYNGAP1 mutations in nonsyndromic intellectual disability and autism. *Biological psychiatry* 69:898-901.
- Hamdan FF et al. (2009) Mutations in SYNGAP1 in autosomal nonsyndromic mental retardation. *The New England journal of medicine* 360:599-605.
- Jiang X, Chen J, Bajić A, Zhang C, Song X, Carroll SL, Cai Z-L, Tang M, Xue M, Cheng N, Schaaf CP, Li F, MacKenzie KR, Ferreon ACM, Xia F, Wang MC, Maletić-Savatić M, Wang J (2017) Quantitative real-time imaging of glutathione. *Nature communications* 8:16087.
- Jimenez-Gomez A, Niu S, Andujar-Perez F, McQuade EA, Balasa A, Huss D, Coorg R, Quach M, Vinson S, Risen S, Holder JL, Jr. (2019) Phenotypic characterization of individuals with SYNGAP1 pathogenic variants reveals a potential correlation between posterior dominant rhythm and developmental progression. *J Neurodev Disord* 11:18.
- Kilinc M, Creson T, Rojas C, Aceti M, Ellegood J, Vaissiere T, Lerch JP, Rumbaugh G (2018) Species-conserved SYNGAP1 phenotypes associated with neurodevelopmental disorders. *Mol Cell Neurosci* 91:140-150.

- 870 Kim JH, Lee HK, Takamiya K, Huganir RL (2003) The role of synaptic GTPase-activating  
871 protein in neuronal development and synaptic plasticity. *J Neurosci* 23:1119-1124.
- 872 Komiyama NH, Watabe AM, Carlisle HJ, Porter K, Charlesworth P, Monti J, Strathdee DJ,  
873 O'Carroll CM, Martin SJ, Morris RG, O'Dell TJ, Grant SG (2002) SynGAP regulates  
874 ERK/MAPK signaling, synaptic plasticity, and learning in the complex with postsynaptic  
875 density 95 and NMDA receptor. *J Neurosci* 22:9721-9732.
- 876 Lek M et al. (2016) Analysis of protein-coding genetic variation in 60,706 humans. *Nature*  
877 536:285-291.
- 878 McMahon AC, Barnett MW, O'Leary TS, Stoney PN, Collins MO, Papadia S, Choudhary JS,  
879 Komiyama NH, Grant SG, Hardingham GE, Wyllie DJ, Kind PC (2012) SynGAP isoforms  
880 exert opposing effects on synaptic strength. *Nature communications* 3:900.
- 881 Michaelson SD, Ozkan ED, Aceti M, Maity S, Llamosas N, Weldon M, Mizrahi E, Vaissiere T,  
882 Gaffield MA, Christie JM, Holder JL, Jr., Miller CA, Rumbaugh G (2018) SYNGAP1  
883 heterozygosity disrupts sensory processing by reducing touch-related activity within  
884 somatosensory cortex circuits. *Nature neuroscience* 21:1-13.
- 885 Mignot C et al. (2016) Genetic and neurodevelopmental spectrum of SYNGAP1-associated  
886 intellectual disability and epilepsy. *J Med Genet* 53:511-522.
- 887 Nehme R et al. (2018) Combining NGN2 Programming with Developmental Patterning  
888 Generates Human Excitatory Neurons with NMDAR-Mediated Synaptic Transmission.  
889 *Cell Rep* 23:2509-2523.
- 890 O'Roak BJ, Stessman HA, Boyle EA, Witherspoon KT, Martin B, Lee C, Vives L, Baker C, Hiatt  
891 JB, Nickerson DA, Bernier R, Shendure J, Eichler EE (2014) Recurrent de novo  
892 mutations implicate novel genes underlying simplex autism risk. *Nature communications*  
893 5:5595.
- 894 Ozkan ED, Creson TK, Kramar EA, Rojas C, Seese RR, Babyan AH, Shi Y, Lucero R, Xu X,  
895 Noebels JL, Miller CA, Lynch G, Rumbaugh G (2014) Reduced cognition in Syngap1  
896 mutants is caused by isolated damage within developing forebrain excitatory neurons.  
897 *Neuron* 82:1317-1333.
- 898 Parker MJ, Fryer AE, Shears DJ, Lachlan KL, McKee SA, Magee AC, Mohammed S,  
899 Vasudevan PC, Park SM, Benoit V, Lederer D, Maystadt I, Study D, FitzPatrick DR  
900 (2015) De novo, heterozygous, loss-of-function mutations in SYNGAP1 cause a  
901 syndromic form of intellectual disability. *Am J Med Genet A* 167A:2231-2237.
- 902 Petanjek Z, Judas M, Simic G, Rasin MR, Uylings HB, Rakic P, Kostovic I (2011) Extraordinary  
903 neoteny of synaptic spines in the human prefrontal cortex. *Proceedings of the National*  
904 *Academy of Sciences of the United States of America* 108:13281-13286.
- 905 Rauch A et al. (2012) Range of genetic mutations associated with severe non-syndromic  
906 sporadic intellectual disability: an exome sequencing study. *Lancet* 380:1674-1682.
- 907 Rumbaugh G, Adams JP, Kim JH, Huganir RL (2006) SynGAP regulates synaptic strength and  
908 mitogen-activated protein kinases in cultured neurons. *Proceedings of the National*  
909 *Academy of Sciences of the United States of America* 103:4344-4351.
- 910 Satterstrom FK et al. (2020) Large-Scale Exome Sequencing Study Implicates Both  
911 Developmental and Functional Changes in the Neurobiology of Autism. *Cell* 180:568-  
912 584 e523.
- 913 Sridharan B, Hubbs C, Llamosas N, Kilinc M, Singhera FU, Willems E, Piper DR, Scampavia L,  
914 Rumbaugh G, Spicer TP (2019) A Simple Procedure for Creating Scalable Phenotypic  
915 Screening Assays in Human Neurons. *Scientific Reports* 9:9000.
- 916 Suresh J, Radojicic M, Pesce LL, Bhansali A, Wang J, Tryba AK, Marks JD, van Drongelen W  
917 (2016) Network burst activity in hippocampal neuronal cultures: the role of synaptic and  
918 intrinsic currents. *J Neurophysiol* 115:3073-3089.
- 919 Vlaskamp DRM et al. (2019) SYNGAP1 encephalopathy: A distinctive generalized  
920 developmental and epileptic encephalopathy. *Neurology* 92:e96-e107.

- 921 von Stulpnagel C, Funke C, Haberl C, Hortnagel K, Jungling J, Weber YG, Staudt M, Kluger G  
922 (2015) SYNGAP1 Mutation in Focal and Generalized Epilepsy: A Literature Overview  
923 and A Case Report with Special Aspects of the EEG. *Neuropediatrics* 46:287-291.  
924 Weldon M, Kilinc M, Lloyd Holder J, Jr., Rumbaugh G (2018) The first international conference  
925 on SYNGAP1-related brain disorders: a stakeholder meeting of families, researchers,  
926 clinicians, and regulators. *J Neurodev Disord* 10:6.  
927 Zhang Y, Pak C, Han Y, Ahlenius H, Zhang Z, Chanda S, Marro S, Patzke C, Acuna C, Covy J,  
928 Xu W, Yang N, Danko T, Chen L, Wernig M, Sudhof TC (2013) Rapid single-step  
929 induction of functional neurons from human pluripotent stem cells. *Neuron* 78:785-798.  
930

**Table 1. Indels present in the clonal SYNGAP1 iPSC lines (relative to starting material)**

**WT #6**

| Allele freq of sample | Allele freq in Cas9 | Coverage | Chrom | Position  | Cas9 sequence                                      | Sample sequence |
|-----------------------|---------------------|----------|-------|-----------|----------------------------------------------------|-----------------|
| 0.5                   | 0.0001196           | 31       | 10    | 19352491  | AGT                                                | A               |
| 0.5                   | 0.032               | 28       | 17    | 80994507  | TGCCTGGCGCTCAGTAGCGTGGCCAGGGCTCCCAGTGTGGGCTCGGTGAC | T               |
| 0.5                   | 0.068               | 34       | 20    | 24930694  | TC                                                 | T               |
| 0.529                 | 0.0001194           | 29       | 5     | 176508392 | C                                                  | CA              |
| 0.554                 | 0.252               | 44       | 8     | 58426202  | CT                                                 | C               |
| 0.556                 | 0.065               | 33       | 8     | 141460362 | CT                                                 | C               |
| 0.641                 | 0.222               | 41       | 10    | 101798408 | CT                                                 | C               |

**WT #30**

| Allele freq of sample | Allele freq in Cas9 | Coverage | Chrom | Position  | Cas9 sequence | Sample sequence |
|-----------------------|---------------------|----------|-------|-----------|---------------|-----------------|
| 0.5                   | 0.0001432           | 34       | 21    | 10483254  | T             | TA              |
| 0.5                   | 0.0005416           | 24       | 8     | 8066187   | T             | TG              |
| 0.502                 | 0.148               | 34       | 14    | 69119490  | T             | TA              |
| 0.502                 | 0.019               | 722      | 19    | 54456134  | TCAC          | T               |
| 0.507                 | 0.029               | 22       | 6     | 4121693   | G             | GT              |
| 0.509                 | 0.045               | 205      | 18    | 14534945  | T             | TA              |
| 0.557                 | 0.026               | 31       | 5     | 93682503  | G             | GT              |
| 0.585                 | 0.02                | 27       | 5     | 142893941 | G             | GT              |
| 0.643                 | 2.76E-05            | 27       | 9     | 91711724  | TAA           | T               |
| 0.643                 | 2.76E-05            | 27       | 9     | 91711733  | G             | GGTA            |

**Table 1. (continued)**

**KO #4**

| Allele freq of sample | Allele freq in Cas9 | Coverage   | Chrom    | Position        | Cas9 sequence | Sample sequence |
|-----------------------|---------------------|------------|----------|-----------------|---------------|-----------------|
| 0.5                   | 0.295               | 49         | 9        | 78300710        | C             | CTT             |
| 0.5                   | 0.119               | 29         | 9        | 91711722        | TGTA          | T               |
| 0.503                 | 0.001171            | 23         | 13       | 108228871       | TA            | T               |
| 0.505                 | 0.061               | 33         | 18       | 23795721        | TA            | T               |
| 0.553                 | 0.116               | 25         | 22       | 31711776        | C             | CA              |
| 0.556                 | 0.192               | 65         | 21       | 43757986        | CT            | C               |
| 0.6                   | 0.247               | 45         | X        | 12817468        | T             | TA              |
| 0.614                 | 0.19                | 51         | 17       | 3814729         | C             | CT              |
| 0.616                 | 0.093               | 23         | 19       | 41837694        | C             | CA              |
| 0.616                 | 0.07                | 27         | 1        | 6581663         | CA            | C               |
| 0.64                  | 0.087               | 31         | 6        | 34819141        | C             | CT              |
| 0.721                 | 0.356               | 74         | 11       | 30873342        | TAC           | T               |
| 0.781                 | 0.275               | 38         | 2        | 96827265        | CT            | C               |
| <b>0.972</b>          | <b>0.022</b>        | <b>315</b> | <b>6</b> | <b>33435551</b> | CG            | C               |

**KO #38**

| Allele freq of sample | Allele freq in Cas9 | Coverage   | Chrom    | Position        | Cas9 sequence | Sample sequence |
|-----------------------|---------------------|------------|----------|-----------------|---------------|-----------------|
| 0.5                   | 0.079               | 28         | 11       | 19155581        | C             | CA              |
| 0.5                   | 0.126               | 27         | 7        | 23505164        | TA            | T               |
| 0.539                 | 0.068               | 28         | 12       | 69284463        | GT            | G               |
| 0.545                 | 0.202               | 42         | 16       | 11156369        | C             | CA              |
| 0.554                 | 0.127               | 45         | 18       | 59824581        | A             | AT              |
| 0.573                 | 0.109               | 36         | 19       | 17988154        | C             | CA              |
| 0.578                 | 0.111               | 28         | 5        | 138505807       | T             | TA              |
| 0.584                 | 0.19                | 56         | 1        | 27552400        | CT            | C               |
| 0.585                 | 0.216               | 41         | 6        | 34219990        | C             | CAAAA           |
| 0.616                 | 0.043               | 23         | 7        | 101627137       | C             | CAAAAA          |
| 0.666                 | 0.093               | 26         | 7        | 48844654        | A             | AT              |
| 0.778                 | 0.021               | 39         | 9        | 130349951       | G             | GCAGTGTT        |
| <b>0.933</b>          | <b>0.00798</b>      | <b>292</b> | <b>6</b> | <b>33435544</b> | TGCCTGTCG     | T               |
